# Comprehensive transcriptional profiling and mouse phenotyping reveals dispensable role for adipose tissue selective long noncoding RNA *Gm15551*

Christoph Andreas Engelhard<sup>1</sup>, Chien Huang<sup>1,2</sup>, Sajjad Khani<sup>3,4</sup>, Petr Kasperek<sup>5</sup>, Jan Prochazka<sup>5</sup>,  
Jan Rozman<sup>5</sup>, David Pajuelo Reguera<sup>5</sup>, Radislav Sedlacek<sup>5</sup> and Jan-Wilhelm Kornfeld<sup>1,3,\*</sup>

<sup>1</sup> Department for Biochemistry and Molecular Biology (BMB), University of Southern Denmark, Campusvej 55, 5230 Odense M, Denmark. <sup>2</sup> Laboratory of Animal Physiology, Department of Animal Science and Technology, National Taiwan University, Taipei, 10617, Taiwan. <sup>3</sup> Max Planck Institute for Metabolism Research, Gleueler Strasse 50, 50931 Köln, Germany. <sup>4</sup> Institute for Diabetes and Cancer (IDC); Helmholtz Zentrum München, German Research Center for Environmental Health, Neuherberg, Germany. <sup>5</sup> Czech Centre for Phenogenomics, Prumyslova 595, 252 50 Vestec, Czech Republic. \* Corresponding author. e-mail: janwilhelmkornfeld@bmb.sdu.dk

## 1 Abstract

Cold and nutrient activated brown adipose tissue (BAT) is capable of increasing systemic energy expenditure via uncoupled respiration and secretion of endocrine factors thereby protecting mice against diet-induced obesity and improving insulin response and glucose tolerance in men. Long non-coding RNAs (lncRNAs) have recently been identified as fine tuning regulators of cellular function. While certain lncRNAs have been functionally characterised in adipose tissue, their overall contribution in the activation of BAT remains elusive. We identified lncRNAs correlating to interscapular brown adipose tissue (iBAT) function in high fat diet (HFD) and cold stressed mice. We focused on *Gm15551* which has an adipose tissue specific expression profile, is highly upregulated during adipogenesis and downregulated by  $\beta$ -adrenergic activation in mature adipocytes. Albeit we performed comprehensive transcriptional and adipocyte physiology profiling *in vitro* and *in vivo*, we could not detect an effect of gain or loss of function of *Gm15551*.

## 2 Key points

long noncoding RNAs; brown adipocytes

## 3 Abbreviations

ANCOVA analysis of covariances

|    |                          |                                             |
|----|--------------------------|---------------------------------------------|
| 17 | <b>ANOVA</b>             | analysis of variances                       |
| 18 | <b>ATP</b>               | adenosine triphosphate                      |
| 19 | <b>BAT</b>               | brown adipose tissue                        |
| 20 | <b>cDNA</b>              | complementary DNA                           |
| 21 | <b>ChIP</b>              | chromatin immunoprecipitation               |
| 22 | <b>DMEM</b>              | Dulbecco's modified Eagle's medium          |
| 23 | <b>DNA</b>               | deoxyribonucleic acid                       |
| 24 | <b>eRNA</b>              | enhancer RNA                                |
| 25 | <b>eWAT</b>              | epididymal white adipose tissue             |
| 26 | <b>FBS</b>               | fetal bovin serum                           |
| 27 | <b>GO</b>                | gene ontology                               |
| 28 | <b>HFD</b>               | high fat diet                               |
| 29 | <b>iBAT</b>              | interscapular brown adipose tissue          |
| 30 | <b>IBMX</b>              | 3-isobutyl-1-methylxanthin                  |
| 31 | <b>IPGTT</b>             | intraperitoneal glucose tolerance test      |
| 32 | <b>iWAT</b>              | inguinal white adipose tissue               |
| 33 | <b>LNA</b>               | locked nucleic acid                         |
| 34 | <b>log<sub>2</sub>FC</b> | log <sub>2</sub> fold change                |
| 35 | <b>lncRNA</b>            | long non-coding RNA                         |
| 36 | <b>LRT</b>               | likelihood ratio test                       |
| 37 | <b>miRNA</b>             | micro RNA                                   |
| 38 | <b>qPCR</b>              | quantitative polymerase chain reaction      |
| 39 | <b>RNA</b>               | ribonucleic acid                            |
| 40 | <b>SDS</b>               | Sodium dodecyl sulfate                      |
| 41 | <b>sgRNA</b>             | single guide RNA                            |
| 42 | <b>siRNA</b>             | small interfering RNA                       |
| 43 | <b>T3</b>                | triiodothyronine                            |
| 44 | <b>TRAP</b>              | translating ribosomal affinity purification |
| 45 | <b>WAT</b>               | white adipose tissue                        |

## 46 **4 Introduction**

47 The prevalence of obesity is increasing worldwide (NCD Risk Factor Collaboration (NCD-RisC),  
48 2016). Obesity is the result of a chronic imbalance between energy intake and expenditure result-  
49 ing in the accumulation of excess adipose tissue. Obesity is correlated with increased overall mor-  
50 tality and is a risk factor for various diseases including cardio vascular disease and diabetes type 2  
51 (Angelantonio et al., 2016; Prospective Studies Collaboration, 2009).

52 Adipose tissue plays a central role in the regulation of energy balance. While white adipose tis-  
53 sue (WAT) mainly functions as storage of excess energy in the form of triglycerides, BAT is a highly  
54 metabolically active tissue (Rosen and Spiegelman, 2014). Morphologically, BAT is densely packed

55 with mitochondria and generates heat by short-circuiting the mitochondrial proton gradient via un-  
56 coupling protein 1 (*UCP1*), facilitating substrate use without ATP generation (Cannon and Nedergaard, 2004).  
57 Thereby active BAT significantly improves glucose and lipid clearance and raises energy expenditure (Betz and Enerbäck, 2017; Klepac et al., 2019).  
58 Additionally, active BAT signals to other tissues improving the whole body metabolic profile via the secretion of endocrine factors and  
59 micro RNA (miRNA) containing exosomes (Scheele and Wolfrum, 2020; Zhang et al., 2019). In this  
60 regard, the recent demonstration of the presence of active BAT in adult humans has led to an increased  
61 interest in understanding the molecular signals underlying BAT differentiation and function  
62 (Betz and Enerbäck, 2017; Nedergaard et al., 2007).

64 The characterisation of the human transcriptome in the course of the ENCODE project revealed  
65 pervasive transcription of three quarters of the human genome (Djebali et al., 2012). Most of the  
66 transcribed sequences however do not fall within protein coding regions but give rise to non-coding  
67 ribonucleic acid (RNA) such as lncRNA (Djebali et al., 2012). lncRNAs are defined as non-coding  
68 genes giving rise to transcripts of more than 200 nt, which do not belong to an otherwise functionally  
69 defined class of RNA (Gil and Ulitsky, 2019). The lack of a functional definition coincides with a  
70 broad range of modes of function: lncRNAs have been shown to act both *in cis* as well as *in trans*  
71 (Gil and Ulitsky, 2019; Yao et al., 2019) via an interaction of the transcribed RNA molecule with other  
72 RNA, proteins or the DNA (Nguyen et al., 2018; Yi et al., 2020). Compared to coding genes, lncRNAs  
73 are on average lower expressed but show more tissue and developmental stage specific expression  
74 profiles, advocating for a role as fine tuning regulators of cellular function (Derrien et al., 2012).  
75 Selected lncRNAs have been shown to interfere with adipose tissue function and differentiation such  
76 as *lncBATE10* which acts as a decoy for Celf1 which would otherwise bind to and repress *Pgc1a*  
77 mRNA (Bai et al., 2017), *H19* which functions as a BAT-specific gatekeeper of paternally expressed  
78 genes (Schmidt et al., 2018) and *Ctcflos* which regulated expression and splicing of *Prdm16* (Bast-  
79 Habersbrunner et al., 2021). However, their overall contribution to these processes remains elusive.

80 In this study, we performed RNA sequencing on BAT from C57BL/6 mice challenged with cold-  
81 treatment and high-fat diet, two physiologically relevant models of BAT activation (Alcalá et al., 2017;  
82 Cannon and Nedergaard, 2004) as well as on a set of seven metabolically active tissues. We found a  
83 set of adipose tissue specific cold and/or diet regulated lncRNAs, from which we selected *Gm15551*  
84 as a candidate for functional studies. The genomic locus of *Gm15551* is bound by *Pparg* and *Prdm16*  
85 in brown adipocytes and it is upregulated in adipogenesis, and downregulated upon  $\beta$ -adrenergic  
86 stimulation in adipocytes. We performed comprehensive phenotyping of gain and loss of function *in*  
87 *vitro* as well as loss of function *in vivo* but could not detect any phenotype related to *Gm15551*.

## 88 5 Results

### 89 Total RNA-seq identifies lncRNAs regulated in activated iBAT

90 In order to identify lncRNAs implicated in the regulation of iBAT function we set out to perform total  
91 RNA-seq on C57BL/6N mice put on a high fat diet regime from 8 weeks of age onwards for 12 weeks  
92 and additionally housed at 4 °C for 24 h at the end of this period (Fig 1A). We found that cold treat-  
93 ment significantly reduced the weight of the iBAT in both the control and the HFD group (Fig S1A),  
94 while HFD treatment alone did not induce significant changes in iBAT weight. On the other hand,  
95 epididymal white adipose tissue (eWAT) and inguinal white adipose tissue (iWAT) as well as liver  
96 weights were increased upon HFD treatment, independent of the cold treatment. Cold treatment

97 alone only induced an increase of eWAT but not iWAT and liver weight. Gene expression meas-  
98 urements reflected the observed difference in the reaction of white and brown adipose tissue to the  
99 treatments (Fig S1B). Cold treatment induced a robust induction of the common adipose marker gene  
100 *Elovl3* as well as the brown adipose markers *Cidea*, *Dio2* and *Ucp1* while HFD alone was insufficient  
101 for the induction of any significant changes in those genes, although *Ucp1* was tendentially up-  
102 regulated. In iWAT however, cold and HFD treatment showed opposing effects. The white adipose  
103 marker gene *Lep* was tendentially repressed upon cold treatment and induced by HFD while *Elovl3*,  
104 *Dio2* and *Ucp1* were upregulated by the cold and downregulated by the HFD treatment. The treat-  
105 ment regimes also directly affected the animals' metabolism as seen by the significantly impaired  
106 glucose tolerance upon HFD treatment (Fig S1C). Energy expenditure was elevated by cold treat-  
107 ment but reduced by HFD treatment (Fig S1D) while the respiratory exchange rates indicated a shift  
108 towards lipid catabolism induced by both cold and HFD treatment (data not shown). Together, these  
109 data indicate our dataset is an adequate model for different functional states of iBAT. Additionally,  
110 we used a second dataset consisting of seven metabolically active tissues (iBAT, iWAT, eWAT, liver,  
111 kidney, muscle, heart) which we have generated for a previous study to be able to assess transcrip-  
112 tome wide tissue specificity (Pradas-Juni et al., 2020). To generate a comprehensive set of lncRNA  
113 genes, we combined the annotated transcript isoforms from GENCODE and the lncRNA isoforms  
114 from RNACentral on gene level.

115 Total RNA-seq of the iBAT dataset identified 2490 differentially expressed genes, among them 216  
116 lncRNA genes (likelihood ratio test (LRT),  $p < 0.001$ ; Fig 1B). The largest cluster (cluster 3) consisted  
117 of genes that were induced by cold treatment independent of the diet and was enriched for genes  
118 involved in stress response and mitochondrion organisation (Fig 1C, Fig S1E). Similarly, cluster 4  
119 contained genes downregulated by cold treatment independently of diet and was enriched for gene  
120 expression regulation and signal transduction. The other clusters included genes with synergistic  
121 interaction of HFD and housing temperature; either being induced (cluster 5, enriched for signalling)  
122 or repressed by HFD and cold treatment (clusters 1 and 2, enriched for extracellular matrix as well  
123 as metabolism). We used the transcriptomics data from the seven metabolically active tissues to  
124 calculate an adipose tissue enrichment score, defined as the ratio of log adipose tissue counts over  
125 the log of total counts. As temperature influenced the gene expression of more genes than HFD, we  
126 focused on genes regulated by the cold treatment. Wald tests identified 110 cold regulated lncRNA  
127 genes ( $s < 0.05$ ), of which 65 (59%) also showed an adipose tissue specific expression profile (adipose  
128 score  $> 50\%$ ; Fig 1D, Fig S1G). On the other hand, from the 610 cold regulated coding genes, only  
129 35% showed adipose tissue specific expression (Fig S1F). Noteworthy, our analysis identified known  
130 brown adipose marker genes such as *Ucp1* and *Adcy3* as well as the lncRNA genes *LncBate10* and  
131 *Ctcflos*, which have previously been shown to play a role in regulation of brown/beige adipose tissue  
132 function (Bai et al., 2017; Bast-Habersbrunner et al., 2021), proving the applicability of our strategy  
133 towards the identification of novel candidate adipose regulating lncRNAs. In order to rule out that  
134 any of the identified lncRNA genes were differentially regulated because of an increased immune  
135 cell infiltration of the iBAT caused by the cold or HFD treatment (Alcalá et al., 2017), we checked the  
136 expression profiles of several immune cell marker genes (Henriques et al., 2020), of which none were  
137 differentially regulated (Fig S1H).



## 138 ***Gm15551* is an adipose specific, highly regulated lncRNA**

139 We further focused our study on the lncRNA *Gm15551*, which was highly adipose specific and signi-  
140 ficantly repressed upon cold treatment in iBAT (Fig 1D). While HFD alone was not sufficient to induce  
141 the repression of *Gm15551* expression, the combination of cold treatment and HFD further repressed  
142 *Gm15551* compared to cold treatment alone (ANOVA;  $p = 0.000701$ , Fig 2A). Among the examined  
143 tissues, the expression of *Gm15551* was observed to be strictly restricted to adipose tissue, similar  
144 to the common adipocyte marker genes *Adipoq* and *Pparg* (Fig 2B). Within the three adipose tissues  
145 we looked at, *Gm15551* showed the highest expression in eWAT and the lowest in iBAT, with inter-  
146 mediate expression in iWAT, anti-correlating to the expression of the thermogenic adipocyte marker  
147 gene *Cidea*. The notion of this expression pattern together with the repression upon activation of  
148 thermogenesis in iBAT led us to hypothesize *Gm15551* might have an anti-thermogenic function.

149 *Gm15551* is expressed from chromosome 3 and there are 2 transcripts annotated which both con-  
150 sist of 2 exons and only differ in the exact position of the transcription end site (Fig 2C). Analysis  
151 of publicly available ChIP-Seq data showed that the locus is bound by the core thermogenic tran-  
152 scription factor Prdm16 in iBAT. Additionally, we found that *Pparg* binds to the *Gm15551* locus in  
153 eWAT, iWAT as well as iBAT with the height of the ChIP-Seq peak correlating with the *Gm15551* RNA  
154 expression levels. Chromatin features such as the ratio of H3K4me1 relative to H3K4me3 have previ-  
155 ously been used to distinguish promoters from enhancers (Natoli and Andrau, 2012). Therefore we  
156 looked at histone modifications using chromatin immunoprecipitation (ChIP)-Seq (S2A). We found  
157 higher levels of H3K4me3 compared to H3K4me1 which is indicative of a promoter as opposed to an  
158 enhancer. H3K327ac signal was higher than H3K4me3 or H3K4me1 and H3K327me3 was basically  
159 absent.

160 As *Gm15551* is expressed antisense from a locus within intron 2 of the intracellular  $Ca^{2+}$  signalling  
161 protein *Camk2d* and it is known that lncRNA can work as *in cis* regulators of nearby coding genes (Gil  
162 and Ulitsky, 2019), we checked whether the expression of *Gm15551* correlates with the expression of  
163 *Camk2d* in various publicly available RNA-Seq datasets of adipose tissue, but found no significant  
164 correlation (ANCOVA,  $p = 0.848$ ; Fig S2B). To exclude the possibility of *Gm15551* being a coding gene  
165 wrongly annotated as lncRNA (Anderson et al., 2015), we calculated the coding potential for all genes  
166 expressed in our dataset using CPAT (Wang et al., 2013). *Gm15551* showed a low coding probability  
167 comparable to other known lncRNA genes as opposed to the brown adipocyte marker genes *Cidea*,  
168 *Adcy3* and *Ucp1* (Fig 2D). Similarly, ranking genes by the ratio of ribosome associated over total RNA  
169 in a publicly available TRAP-Seq data set of iBAT sorted *Gm15551* with other lncRNA genes (Fig  
170 S2C).

171 Next we followed the gene expression of *Gm15551* during the differentiation of preadipocytes into  
172 mature adipocytes. Our analysis showed that *Gm15551* is highly upregulated already early in differ-  
173 entiation, similar to the core adipocyte transcription factor *Pparg* and unlike *Ucp1* which only reaches  
174 maximum levels in late differentiation (Fig 2E). In order to mimic the effects of cold treatment on  
175 adipose tissue *in vitro*, we stimulated cells with the non-selective  $\beta$ -adrenergic agonist isoproterenol  
176 or  $\beta_3$  specific agonist CL316243. Both stimuli were sufficient to repress *Gm15551* in differentiated  
177 adipocytes originating from eWAT, iWAT and iBAT (Fig 2F). In primary immortalized brown adipo-  
178 cytes, the effect of  $\beta$ -adrenergic stimulation on the expression of *Gm15551* was stable over 24 h (Fig  
179 S2D).

180 **Gain- and loss-of-function of *Gm15551* does not disturb brown adipocyte development and**  
181 **function *in vitro***

182 To investigate the role of *Gm15551* in differentiation and function of brown adipocytes, we used an  
183 immortalized brown preadipocyte cell line stably expressing the CRISPRa SAM system for gain-  
184 of-function studies together with locked nucleic acid (LNA) antisense oligonucleotides for loss-of-  
185 function studies (Lundh et al., 2017). Transfection of either one of two plasmids encoding single  
186 guide RNAs (sgRNAs) targeting *Gm15551* two days prior to the induction of the differentiation led to  
187 a robust overexpression of *Gm15551* compared to the empty vector control at day 1 of differentiation  
188 (Fig 3A). The effect of the overexpression was greatly diminished on day 4 and 7 because the natural  
189 gene expression of *Gm15551* rises during differentiation. However, we could not observe any changes  
190 in the expression of common and brown adipocyte marker genes or in the cells ability to accumulate  
191 lipids (Fig 3A, B, Fig S3A).

192 Next we set out to knock down *Gm15551* in mature adipocytes. In order to detect potential in-  
193 teractions of *Gm15551* expression with thermogenic activation of brown adipocytes, we looked at  
194 cells both under basal conditions and under  $\beta$ -adrenergic stimulation. Reverse transfection with  
195 two different LNAs targeting *Gm15551* on day 4 of differentiation resulted in robust downregula-  
196 tion of *Gm15551* on day 7 compared to the non-targeting control LNA (Fig S3B). Overall, we found  
197 2762 genes differentially regulated by either knockdown or stimulation (Fig 3C). Hierarchical clus-  
198 tering showed, that the influence of the  $\beta$ -adrenergic stimulation was more pronounced than that  
199 of the loss-of-function of *Gm15551*. Samples treated with the control non-targeting LNA clustered  
200 together with LNA1 treated samples in both the basal and stimulated condition, indicating that the  
201 two LNAs used caused different effects. Looking at the specific effect of the each LNA individually,  
202 we found 70 and 188 differentially regulated genes respectively (Fig 3E, Fig S3C). There was only an  
203 overlap of 16 genes detected to be significantly regulated by the knockdown of *Gm15551* using either  
204 of the two LNAs. Gene ontology (GO) analysis revealed that these genes were enriched for signalling  
205 and especially NF- $\kappa$ B mediated signalling (data not shown).

206 Similarly, reverse transfection with sgRNA encoding plasmids led to a small but significant over-  
207 expression of *Gm15551* in fully matured adipocytes and noteworthy was able to suppress its down-  
208 regulation upon  $\beta$ -adrenergic stimulation (Fig S3D). However, we did not observe any changes in  
209 the gene expression of any of the probed adipocyte marker genes. We further raised the overexpres-  
210 sion efficiency by simultaneous transfection of two different plasmids encoding sgRNAs targeting  
211 *Gm15551* (Fig S3E). We sequenced the transcriptomes of these samples and found a total of 792 genes  
212 differentially regulated by either gain-of-function of *Gm15551* or  $\beta$ -adrenergic stimulation (Fig 3D).  
213 The effect of the thermogenic activation dominated the dataset as shown by hierarchical clustering.  
214 However, there were also two clusters with genes affected by the overexpression of *Gm15551*. When  
215 we specifically looked for changes in gene expression caused by the *Gm15551* gain-of-function, we  
216 found 14 differentially expressed genes and GO analysis showed an enrichment for genes involved  
217 in inflammatory response (Fig 3E, F).

218 Comparison between the genes differentially regulated by the gain and loss-of-function of *Gm15552*  
219 showed that there was no overlap. Additionally, most genes affected by the knock down of *Gm15551*  
220 showed no change in gene expression in the gain-of-function experiment (Fig S3H). Finally, Oil red  
221 O staining of mature adipocytes showed no effect of either gain or loss-of-function of *Gm15551* on  
222 the cells' ability for lipid accumulation (Fig S3F).

## 223 ***Gm15551* loss-of-function does not impair adipose tissue function *in vivo***

224 Next we created a loss-of-function mouse model by knocking out exon 1 of *Gm15551*. Since brown  
225 adipose tissue plays a role in the regulation of body weight as well as lipid and glucose metabolism  
226 (Rui, 2017), we challenged homozygous  $\Delta Gm15551$  mice and wild type litter mates from 8 weeks of  
227 age for 12 weeks with a high fat diet and repeatedly measured body weight and performed intraperi-  
228 toneal glucose tolerance test (IPGTT), and indirect calorimetry (Fig S4A). While the HFD was suffi-  
229 cient to provoke a significant raise in body weight (Fig 4A;  $p = 0.038$ ) characterised by an increased  
230 amount of body fat (Fig S4B;  $p = 0.027$ ), we did not observe significant changes induced by the loss-  
231 of-function of *Gm15551* ( $p = 0.29$  and  $0.76$  respectively). Similarly, prolonged HFD treatment but not  
232 *Gm15551* loss-of-function resulted in impaired glucose tolerance (Fig 4B; no p as too little n). Addi-  
233 tionally, adipocyte diameter and morphology of HFD treated animals was not affected by *Gm15551*  
234 knockout (Fig S4C, D;  $p = 0.359$ ). Next we performed indirect calorimetry while sequentially chan-  
235 ging the temperature first from room temperature to thermoneutrality ( $30^{\circ}\text{C}$ ), followed by a period  
236 at  $4^{\circ}\text{C}$  before returning to room temperature ( $23^{\circ}\text{C}$ ). Upon the beginning of thermoneutrality, energy  
237 expenditure slightly dropped and consequently raised when the temperature was dropped. Upon  
238 return to room temperature, the energy expenditure went back to the starting point (Fig 4C). How-  
239 ever, there was no effect of the *Gm15551* knock out (no statistics done so far because to little number  
240 of animals). Respiratory exchange ratio of control diet animals raised with the onset of the first dark  
241 phase at thermoneutrality and dropped again in the following light phase indicating combustion of  
242 carbohydrates taken up with the food during dark phase (Fig 4D). With prolonged cold treatment,  
243 the respiratory exchange rate rose again to an intermediate value indicating the mice had to take  
244 up food in addition to combusting stored lipids. At the end of the cold treatment, the respiratory  
245 exchange rate rose even further indicative of the mice mostly relying on energy from the taken up  
246 carbohydrates. This effect of temperature and day light cycle was mostly suppressed in HFD animals  
247 as they take up less carbohydrates with their alimentation. Again there was no evidence of an impact  
248 of the *Gm15551* loss-of-function (no statistics done).

249 When we compared the adipose tissue transcriptomes from HFD and control diet fed animals,  
250 we found 5655 differentially expressed genes (LRT,  $p < 0.001$ ; Fig 4C). Hierarchical clustering was  
251 strongly driven by the difference between brown and white adipose tissues. Gene ontology analysis  
252 showed that the genes with higher expression in brown adipose tissue were enriched for the terms  
253 related to mitochondria, while genes showing a higher expression in white adipose tissue were en-  
254 riched for terms related to immune system and locomotion (Fig S4E). The direct comparison of the  
255 samples from wild type animals with those from knock out animals revealed only 11 differentially  
256 regulated genes (wald test,  $s < 0.05$ ; S4F). Additionally, we compared the gene expression for iBAT  
257 from wild type and  $\Delta Gm15551$  mice both at room temperature and after 24 h of cold treatment. Over-  
258 all, there were 2531 differentially expressed genes (LRT,  $p < 0.001$ ), which clustered the samples by  
259 temperature but not genotype (4F). Both sets of up and down regulated genes upon cold treatment  
260 showed enrichment for terms related to metabolism (S4G). Also the direct comparison of the wild  
261 type transcriptomes with those from  $\Delta Gm15551$  animals only revealed 6 differentially expressed  
262 genes (wald test,  $s < 0.05$ ; S4H).

## 263 6 Discussion

264 Cold and nutrient activated BAT regulates energy homeostasis and improves metabolic status via  
265 non-shivering thermogenesis and the secretion of endocrine factors (Betz and Enerbäck, 2017; Scheele  
266 and Wolfrum, 2020). lncRNAs have been shown to be tissue specific fine tuning regulators of tissue  
267 function, and therefore have been proposed as potential selective targets for the treatment of differ-  
268 ent diseases (Matsui and Corey, 2017; Wahlestedt, 2013). In the recent years, the function of some  
269 lncRNAs expressed in adipose tissue has been described (reviewed by Sun and Lin, 2019). However,  
270 the function of most lncRNAs remains unknown. Here, we detected a set of 65 lncRNAs whose ex-  
271 pression is specific to adipose tissue and correlates with BAT function and characterised *Gm15551*  
272 further *in vitro* and *in vivo*.

273 We found *Gm15551* to be highly adipose tissue specific with a higher expression in white compared  
274 to brown adipose tissues. *Gm15551* is highly induced in the early stages of brown adipogenesis and  
275 downregulated upon beta adrenergic stimulation in both white and brown adipocytes. We could  
276 show that the key transcription factor Prdm16, which controls the determination of brown adipocy-  
277 tes and the browning of white adipose tissue (Seale et al., 2011, 2007), binds to the *Gm15551* locus  
278 in iBAT. Further, we found the *Gm15551* locus to be occupied by Pparg in white as well as brown  
279 adipose tissues with a more pronounced occupancy in white compared to brown adipose tissue.  
280 Pparg is a transcription factor involved in the maintenance of the general adipocyte phenotype but  
281 also showing depot specific binding patterns (Siersbæk et al., 2012). These findings led us to hypo-  
282 thesize an adipocyte specific function of *Gm15551*.

283 Previous studies have shown that lncRNAs might give rise to unidentified translation products  
284 (Anderson et al., 2015; Ji et al., 2015). We used a sequence based bioinformatics tool to calculate  
285 coding probability and analysed a public TRAP-Seq data set to detect ribosome associated RNAs.  
286 Our results showed that *Gm15551* has a low coding probability and is not associated with ribosomes.  
287 While enhancers are known to give rise to bidirectionally transcribed, short, unspliced and unstable  
288 enhancer RNAs (eRNAs), it has recently been reported that some enhancers can also be the place of  
289 unidirectional transcription giving rise to spliced lncRNAs (Gil and Ulitsky, 2018; Natoli and Andrau,  
290 2012). The *Gm15551* locus featured a low ratio of the H3K4me1 over the H3K4me3 histone mark, in-  
291 dicative of promoters. However, the *Gm15551* locus also features H3K27ac histone marks, high levels  
292 of which are characteristic for enhancers (Natoli and Andrau, 2012). Enhancers are cis-regulatory ele-  
293 ments, regulating the expression of nearby genes. Therefore we compared the expression of *Gm15551*  
294 and *Camk2d*, which overlaps with *Gm15551* in the genome, in several adipocyte related RNA-Seq  
295 datasets but found no correlation. However, we cannot rule out a potential enhancer function of  
296 *Gm15551*.

297 In order to unveil potential effects of *Gm15551* gain-of-function on brown adipogenesis, we over-  
298 expressed *Gm15551* two days prior to the induction of differentiation in a brown preadipocyte cell  
299 line, but could not measure any effect of the overexpression neither on common and brown adipocy-  
300 te marker genes nor on lipid accumulation, both under basal conditions and under  $\beta$ -adrenergic  
301 stimulation. Likewise, there was no effect on lipid accumulation in the subsequent gain- and loss-  
302 of-function experiments in mature brown adipocytes. On transcriptome level, we hypothesised that  
303 gain- and loss- of function of *Gm15551* should lead to opposite effects on the gene expression of po-  
304 tential target genes of *Gm15551*. However, there were no genes that were significantly regulated in  
305 both datasets. Furthermore, most genes differentially regulated in one dataset did not even show a



306 (non-significant) regulation in the other one. Those genes that were oppositely regulated by *Gm15551*  
307 gain- and loss-of-function such as *Lcn2*, *Saa3*, and *Hp* are inflammatory markers (Maffei et al., 2016;  
308 Sommer et al., 2009, 2008). We have previously found them to be differentially regulated by other  
309 sgRNAs in several datasets using the wt1-SAM model system and therefore interpret them as a model  
310 specific artefact.

311 As impaired iBAT function has been shown to render mice susceptible to diet-induced obesity and  
312 insulin intolerance (Guerra et al., 2001; Lowell et al., 1993), we put  $\Delta Gm15551$  mice on HFD for 12  
313 weeks and additionally repeatedly tested their response to cold treatment by indirect calorimetry.  
314 While both the prolonged HFD treatment and sex caused clear differences, we could not detect any  
315 significant effect of the *Gm15551* loss-of-function on the examined adipose tissue and metabolic para-  
316 meters such as energy expenditure, body weight and glucose tolerance. However, as the dataset is  
317 currently not well balanced, several of the experiments could so far not be statistically analysed. The  
318 last two cohorts are expected to be analysed in early 2022. When we analysed adipose tissue tran-  
319 scriptomes, clear differences between the white and brown adipose tissues as well as between iBAT  
320 from cold treated and control animals became evident. However, the *Gm15551* knockout only caused  
321 a minor number of differentially expressed genes, not exceeding what is expected as false positives.

322 We have identified a set of adipose tissue specific, HFD and cold regulated lncRNAs from which  
323 we characterised *Gm15551*. Albeit it is highly upregulated during brown adipogenesis and its expres-  
324 sion correlates with iBAT activity, we could not detect a phenotype of either gain or loss-of-function  
325 of *Gm15551* *in vitro*. Likewise we could not detect a *Gm15551* related phenotype when per-  
326 forming comprehensive transcriptomic and adipose tissue physiologic phenotyping *in vivo*. In con-  
327 clusion, our findings indicate that *Gm15551* is dispensable for iBAT development and function, des-  
328 pite its marked upregulation during initial adipose tissue development. This result is in concordance  
329 with a study, which previously found *Gm15551* to be upregulated in both white and brown adipo-  
330 genesis, but detected no effect of small interfering RNA (siRNA) mediated knockdown of *Gm15551*  
331 on white adipocyte differentiation (Sun et al., 2013). While we have not ruled out a potential effect of  
332 a knockdown of *Gm15551* in brown preadipocytes on adipogenesis, the lack of a phenotype in white  
333 adipogenesis as well as *in vivo* investigations makes it appear implausible to find a phenotype in  
334 brown adipogenesis. Functional redundancy has been reported for coding genes such as CD34 and  
335 for duplicated genes in general (Hughes et al., 2020; Qian et al., 2010). Furthermore, lncRNAs have  
336 been shown to have tissue and cell state dependent and potentially very subtle functions (Derrien  
337 et al., 2012). We cannot rule out the possibility of the existence of other genes showing functional  
338 redundancy to *Gm15551* hiding any effects of the *Gm15551* loss-of-function. It was recently reported  
339 that in mouse and zebra fish several lncRNAs, which were selected because of their high expression  
340 levels, conservation or because they were located proximal to known coding developmental regu-  
341 latory genes, had no effect on embryogenesis, viability and fertility (Goudarzi et al., 2019; Han et  
342 al., 2018). In conclusion, while *Gm15551* is specifically expressed in adipose tissues and we sub-  
343 jected mice both to HFD and cold treatment, two major stressors of adipose tissue (Alcalá et al., 2017;  
344 Sanchez-Gurmaches et al., 2016), it is possible that *Gm15551* exhibits either a very subtle function  
345 undetectable by our measurements, a context-dependent function in a specific cellular state that we  
346 have not investigated, or it might also be that *Gm15551* has no biological function in murine adipose  
347 tissue.

## 348 **7 Material and methods**

### 349 **Animal experiments**

350 Unless otherwise stated, mice were kept at 22 °C to 24 °C on a regular 12 h light cycle with *ad libitum*  
351 access to food and water. Wild type C57BL/6N mice used for the detection of differentially regulated  
352 genes and ChIP-Seq in iBAT were fed chow diet (Ssniff V1554) up to the age of 8 weeks, where the  
353 respective cohorts were put on HFD (Ssniff D12492 (I) mod.) for 12 weeks and kept at 4 °C for 24 h.  
354 ΔGm15551 mice used for transcriptomics analyses were fed chow diet (Altromin 1324). ΔGm15551  
355 mice used for metabolic phenotyping were fed chow diet (Altromin 1314). Respective cohorts were  
356 put on high fat diet (Ssniff D12492 (I) mod.) for 12 weeks starting from 8 weeks of age.

### 357 **Generation of *Gm15551* knock out animals**

358 The mouse model for genetic deficiency of *Gm15551* was generated at the Czech Centre for Phenogen-  
359 omics using CRISPR/Cas9 targeting exon 1 of *Gm15551* on the background of C57BL/6N. Sanger se-  
360 quencing verified a 1113 bp deletion including exon 1 of *Gm15551* (3:126462197-126463309, GRCm38).  
361 Knock out mice were backcrossed with wild type animals for two generations to minimise the risk  
362 of off target effects. Genotyping was carried out by two separate PCRs using primers F3/R2 (Tab S1;  
363 372 bp and 1377 bp for knock out and wild type alleles respectively) and F5/R4 (234 bp for wildtype  
364 allele only). DNA extracted from tail tips using proteinase K digestion and Chelex 100 Resin (Bio-  
365 rad 1432832) was amplified for 30 cycles at 95 °C, 60 °C and 72 °C for 30 s each and visualised using  
366 capillary gel electrophoresis (Fragment Analyzer, Advanced Analytics).

### 367 **Indirect calorimetry**

368 Prior to the experiment, a complete calibration protocol for the gas analysers was run according to  
369 the manufacturer's recommendations and mice were weighed. The mice were singly housed in a  
370 PhenoMaster device (TSE systems) at a regular 12 h light cycle and 55 % relative humidity with *ad*  
371 *libitum* access to water and the respective diet. At 11, 15 and 19 weeks of age, mice underwent a  
372 temperature challenge starting at 23 °C, followed by 6 h at 30 °C, 18 h at 4 °C and 9 h at 23 °C again.  
373 Sampling rate was 15 min.

### 374 **IPGTT**

375 Animals were fasted overnight (16 h to 18 h) with free access to water. After weighing, the mice  
376 received 2 g kg<sup>-1</sup> i.p. glucose. Blood glucose was measured fasted and after 15, 30, 60 and 120 min  
377 using a standard glucometer.

### 378 **Adipocyte diameter**

379 Hematoxylin and eosin staining was performed on tissue slices and slides were scanned. Two rep-  
380 resentative areas per tissue were exported and analysed using adiposoft (Galarraga et al., 2012).

### 381 **RNA isolation and reverse transcription**

382 Cells or frozen tissue samples were homogenised and lysed in TRIsure (Bioline). Total RNA was isol-  
383 ated using EconoSpin All-In-One Mini Spin Columns (EconoSpin 1920-250) and reverse transcribed



384 into cDNA using the High Capacity cDNA Reverse Transcription Kit (Applied Biosystems 4368814)  
385 following the manufacturer's instructions.

### 386 **Quantitative polymerase chain reaction (qPCR)**

387 qPCR was performed in 384 well format in a LightCycler 480 II (Roche). 4  $\mu$ l of 1:20 diluted cDNA,  
388 0.5  $\mu$ l gene specific primer mix (5  $\mu$ M each) and 4.5  $\mu$ l FastStart Essential cDNA Green Master (Roche)  
389 were amplified using 45 cycles of 25 s at 95 °C, 20 s at 58 °C and 20 s at 72 °C after 300 s at 95 °C initial  
390 denaturation. All combinations of primers and samples were run in duplicates and  $C_q$  values cal-  
391 culated as the second derivative maximum. Genes of interest were normalised against housekeeper  
392 genes using the  $\Delta C_q$  method. The primers used in this study can be found in Tab S4.

### 393 **Total RNA sequencing**

394 RNA sequencing and library preparation were performed at the Cologne Center for Genomics (Co-  
395 logne, Germany) according to their standard protocols. Before RNA sequencing, rRNA was depleted  
396 according to the instructions of the Illumina TruSeq kit. All sequencing experiments were accom-  
397 plished with a paired-end protocol and a depth resulting in  $50 \times 10^6$  to  $75 \times 10^6$  paired reads per  
398 sample. Before RNA sequencing, genomic DNA was eliminated following the instructions of the  
399 TURBO DNA-free™ Kit and subsequently 1  $\mu$ l RNA was used to examine RNA integrity in an Agi-  
400 lent 2100 Bioanalyzer Analysis System.

### 401 **Poly A RNA sequencing**

402 Paired end libraries were constructed using the NEBNext Ultra II RNA Library Prep Kit for Illumina  
403 following the manufacturer's protocol and sequenced on an Illumina NovaSeq 6000 in 2 x 50-bp  
404 paired end reads.

### 405 **RNA sequencing data analysis**

406 Reads were quality filtered using cutadapt (Martin, 2011). For visualisation, reads were mapped to  
407 the GRCm38 genome using STAR (Dobin et al., 2013). For quantification, reads were mapped to the  
408 Gencode M22 transcriptome or a combination of M22 and RNACentral 5 using salmon (Patro et al.,  
409 2017).

### 410 **ChIP sequencing**

411 For histone modification sequencing, brown adipose tissues of two mice were used each sequencing  
412 experiment. Prior to ChIP, BAT was dissociated using a gentleMACSTM Dissociator (Miltenyi biotec,  
413 Germany). The cell suspension was cross linked with 1 % formaldehyde for 10 min at RT and the  
414 reaction was quenched with 0.125 M glycine for 5 min to 10 min at RT. Cells were washed twice with  
415 cold PBS and PMSF and snap-frozen in liquid nitrogen before storing at  $-80^\circ\text{C}$ .

416 Frozen pellets were thawed on ice for 30 min to 60 min. Pellets were resuspended in 5 ml lysis  
417 buffer 1 (50 mM Hepes, 140 mM NaCl, 1 mM EDTA, 10 % glycerol, 0.5 % NP-40, 0.25 % Triton X-100) by  
418 pipetting and then rotated vertically at 4 °C for 10 min. Pellets were resuspended in 5 ml lysis buffer 2  
419 (10 mM Tris, 200 mM NaCl, 1 mM EDTA, 0.5 mM EGTA) and incubated at vertical rotation and at room  
420 temperature for 10 min. Samples were centrifuged for 5 min at 1350 g at 4 °C and supernatant was

421 carefully aspirated. Then, samples were resuspended in 3 ml lysis buffer 3 (10 mM Tris, 100 mM NaCl,  
422 1 mM EDTA, 0.5 mM EGTA, 0.1 % Na-deoxycholate, 0.5 % N-lauroylsarcosine) and were separated  
423 into 2 times 1.5 ml in 15 ml polypropylene tubes, in which they were sonicated with the following  
424 settings by Bioruptor<sup>®</sup> Plus sonication: power = high, on interval = 30 s, off interval = 45 s, total time  
425 = 10 min (18 cycles of on/off). Sonicated samples were transferred to a 1.5 ml microfuge tube and  
426 were centrifuged for 10 min at 16 000 g at 4 °C to pellet cellular debris. 10 % of sample solution were  
427 stored to be used as input control, while the rest was used for ChIP.

428 To capture different histone modifications, 5 µg to 10 µg of the respective antibodies (Tab S5) were  
429 added to the sonicated ChIP reaction and rotated vertically at 4 °C overnight. 100 µl Dynabeads  
430 (Protein A or Protein G) for each ChIP sample were prepared according to the manufacturer's in-  
431 structions, mixed with 1 ml of antibody-bound chromatin and rotated vertically at 4 °C for at least 2 h  
432 to 4 h. Bound beads were washed at least five times in 1 ml cold RIPA (50 mM Hepes, 500 mM LiCl,  
433 1 mM EDTA, 1 % NP-40, 0.7 % Na-deoxycholate) and once in 1 ml cold TE buffer containing 50 mM  
434 NaCl. Samples were eluted for 15 min with elution buffer (50 mM Tris, 10 mM EDTA, 1 % SDS) at  
435 65 °C and continuously shaken at 700 min<sup>-1</sup>. Beads were separated using a magnet and 200 µl super-  
436 natant were transferred to fresh microfuge tubes. Input samples were thawed and mixed with 300 µl  
437 elution buffer. ChIP/input samples were incubated at 65 °C in a water bath overnight to reverse the  
438 cross linking reaction. TE buffer was added at room temperature to dilute SDS in both ChIP and  
439 input samples. For digestion of RNA and protein contamination, RNase A was added to the samples  
440 and incubated in a 37 °C water bath for 2 h; then proteinase K was added to a final concentration of  
441 0.2 mg ml<sup>-1</sup> and incubated in a 55 °C water bath for 2 h. Finally, DNA was extracted using a standard  
442 phenol-chloroform extraction method at room temperature and DNA concentrations were measured  
443 using a NanoDrop ND-1000 spectrophotometer or Qubit dsDNA HS Assay Kit and stored at -80 °C  
444 until sequencing.

#### 445 **ChIP sequencing data analysis**

446 Reads were mapped to the GRCm38 genome using bowtie2 (Langmead and Salzberg, 2012) after  
447 quality filtering by cutadapt.

#### 448 **Tissue specificity**

449 Tissue specificity scores were calculated for every gene over seven metabolically active tissues as  
450  $\frac{\log_2(TPM_n+1)}{\sum \log_2(TPM_n+1)}$  as described by (Alvarez-Dominguez et al., 2015) from RNA-Seq data that we have  
451 previously published (GEO: GSE121345).

#### 452 **Gene set enrichment analysis**

453 Gene set enrichment was done using topGO for GO (Alexa et al., 2006) and ReactomePA for reactome  
454 (Yu and He, 2016).

#### 455 **Assessment of coding potential**

456 Coding potential was calculated using CPAT (Wang et al., 2013). Ribosome scores were calculated as  
457  $\log_2(\text{TRAP}/\text{totalRNA})$ , where TRAP are the normalised counts from a publicly available dataset of

458 translating ribosomal affinity purification (TRAP) of mouse iBAT (GEO: GSE103617) and totalRNA  
459 are the normalised counts from the room temperature control diet iBAT total RNA samples.

#### 460 **Primary cell culture**

461 Inguinal and epididymal white as well as intrascapular brown adipose tissues from 6 to 8 week old  
462 C57BL/6J mice were dissected, minced and digested with collagenase II (worthington) and dispase  
463 II (Sigma, iBAT only). Cells were seeded in 24 well plates and grown in DMEM/Ham's F12 medium  
464 supplemented with 0.1 % Biotin/D-Pantothenate (33 mM/17 mM), 1 % penicillin-streptomycin and  
465 20 % FBS. Upon reaching confluency, FBS concentration was reduced to 10 % and differentiation was  
466 induced using 1  $\mu$ M rosiglitazone, 850 nM insulin, 1  $\mu$ M dexamethasone, 250  $\mu$ M 3-isobutyl-1-methyl-  
467 xanthin (IBMX), 125  $\mu$ M indomethacine (brown only) and 1 nM triiodothyronine (T3) (iBAT only).  
468 Subsequently, medium was changed every other day for medium containing 10 % FBS, rosiglitazone  
469 and T3 (iBAT only). Full differentiation was reached 7 days after induction. Cells were stimulated  
470 using 1  $\mu$ M isoproterenol or 10  $\mu$ M CL316243.

#### 471 **Cultivation of brown adipocyte cell lines**

472 The wt1-SAM brown preadipocyte cell line was a kind gift from Dr. Brice Emanuelli. The cells  
473 were grown in high glucose DMEM supplemented with 10 % FBS and 1 % penicillin-streptomycin.  
474 After reaching confluency, differentiation was induced by 0.5  $\mu$ M rosiglitazone, 1 nM T3, 1  $\mu$ M Dexa-  
475 methasone, 850 nM insulin, 125  $\mu$ M indomethacine and 500  $\mu$ M IBMX. Two days later, medium was  
476 exchanged for medium supplemented with 0.5  $\mu$ M rosiglitazone and 850 nM insulin. Afterwards, me-  
477 dium was changed for medium containing 0.5  $\mu$ M rosiglitazone every second day. Full differentiation  
478 was reached 7 days after induction.

479 PIBA cells were cultured in the same medium as wt1-SAM cells. A common induction/stimulation  
480 cocktail consisting of 10  $\mu$ M rosiglitazone, 1 nM T3, 0.5  $\mu$ M Dexamethasone, 850 nM insulin, 12.5  $\mu$ M  
481 indomethacine and 125  $\mu$ M IBMX was used to differentiate cells.

#### 482 ***In vitro* gain and loss of function studies**

483 For *in vitro* gain of function studies using the wt1-SAM cell line, sgRNAs were designed using CRIS-  
484 Pick (Doench et al., 2014) and cloned into the sgRNA(MS2) cloning backbone (addgene 61424) as  
485 described by Konermann et al. (2015). Empty vector and *Ucp1* targeting sgRNAs were used as con-  
486 trols and were kind gifts of Dr. Brice Emanuelli (Lundh et al., 2017). Target sequences used are found  
487 in Tab S2.

488 LNA gapmers designed and synthesized by Qiagen were used for *in vitro* loss of function experi-  
489 ments. Two non targeting scrambled LNAs were used as control (Tab S3).

490 Preadipocytes were transfected by seeding 30 000 cells per well of a 24 well plate in growth medium  
491 and adding 1.5  $\mu$ l TransIT-X2 (Mirus) and 125 ng plasmid DNA or 1.4  $\mu$ l LNA (10  $\mu$ M) in 50  $\mu$ l Opti-  
492 MEM I once the cells had attached.

493 In order to transfect mature adipocytes, 3  $\mu$ l TransIT and 250 ng plasmid DNA or 1.4  $\mu$ l (10  $\mu$ M) in  
494 100  $\mu$ l Opti-MEM I were pipetted into a well of a 24 well plate. After 15 min, 500 000 cells resuspended  
495 in 500  $\mu$ l Opti-MEM were added. 24 h later, medium was changed for regular differentiation medium.

## 496 **Oil red O staining**

497 Cells were fixed with 4 % formalin for 30 min, rinsed once with water followed by 60 % isopropanol.  
498 Cells were stained with Oil Red O (0.3 % in 60 % isopropanol) for 10 min. Excess dye was rinsed with  
499 water. For quantification, the Oil Red O was eluted in 100 % isopropanol and OD measured at 520 nm  
500 in a multi plate reader.

## 501 **Statistical analysis**

502 Statistics for RNA-Seq data was done in DESeq2 (Love et al., 2014) using LRTs for factors with mul-  
503 tiple levels or for analysing multiple factors at once and wald tests otherwise. Log fold changes were  
504 shrunken and *s*-values calculated using apegln (Zhu et al., 2018). Data from animal experiments  
505 with repeated measurements were averaged over temperature and day/night conditions and ana-  
506 lysed using mixed-effects models with the body weight as cofactor and individual animal as random  
507 variable. Other data was analysed using Student's *t*-tests and adjusted for multiple testing using  
508 Holm's method. Shown are individual values in addition to mean  $\pm$ standard error of the mean.

## 509 **8 Acknowledgements**

510 CH was funded by the National Taiwan University and the grant 109-2917-I-002-029 from the Min-  
511 istry of Science and Technology, Taiwan. The authors used services of the Czech Centre for Phenoge-  
512 nomics supported by the Czech Academy of Sciences RVO 68378050 and by the project LM2018126  
513 Czech Centre for Phenogenomics provided by Ministry of Education, Youth and Sports of the Czech  
514 Republic. JWK and CHE were funded by the University of Southern Denmark and the Danish Dia-  
515 betes Academy, which is in turn funded by the Novo Nordisk Foundation.

## 516 **9 Author contributions**

517 CHE performed experiments with primary adipocytes, *Gm15551* gain of function experiments in  
518 preadipocytes, bioinformatic analyses, analysed the data, designed the study and wrote the ma-  
519 nuscript. CH performed the *Gm15551* gain and loss of function experiments in mature adipocytes  
520 and helped with the  $\Delta$ *Gm15551* loss of function experiments for transcriptomics. SK performed the  
521 experiments with wild type mice used for transcriptomics and performed ChiP. PK generated the  
522  $\Delta$ *Gm15551* knockout mouse model. JP, JR and DPR planned and performed the metabolic phen-  
523 otyping of the  $\Delta$ *Gm15551* mice. RS supervised the generation and metabolic phenotyping of the  
524  $\Delta$ *Gm15551* mice. JWK designed and supervised the study and wrote the manuscript.

## 525 **10 Conflict of interest**

526 The authors declare no competing interest.

## 527 11 References

- 528 Alcalá, M., Calderon-Dominguez, M., Bustos, E., Ramos, P., Casals, N., Serra, D., Viana, M. and Her-  
529 rero, L. (22nd Nov. 2017). Increased inflammation, oxidative stress and mitochondrial respiration  
530 in brown adipose tissue from obese mice. *Scientific Reports* 7(1), 16082. DOI: 10.1038/s41598-  
531 017-16463-6.
- 532 Alexa, A., Rahnenführer, J. and Lengauer, T. (1st July 2006). Improved scoring of functional groups  
533 from gene expression data by decorrelating GO graph structure. *Bioinformatics* 22(13), 1600–1607.  
534 DOI: 10.1093/bioinformatics/btl140.
- 535 Alvarez-Dominguez, J.R., Bai, Z., Xu, D., Yuan, B., Lo, K.A., Yoon, M.J., Lim, Y.C., Knoll, M., Slavov,  
536 N., Chen, S., Peng, C., Lodish, H.F. and Sun, L. (5th May 2015). De novo Reconstruction of Adipose  
537 Tissue Transcriptomes Reveals Novel Long Non-coding RNAs that Regulate Brown Adipocyte  
538 Development. *Cell Metab* 21(5), 764–776. DOI: 10.1016/j.cmet.2015.04.003.
- 539 Anderson, D.M., Anderson, K.M., Chang, C.-L., Makarewich, C.A., Nelson, B.R., McAnally, J.R., Kas-  
540 aragod, P., Shelton, J.M., Liou, J., Bassel-Duby, R. and Olson, E.N. (12th Feb. 2015). A Micropeptide  
541 Encoded by a Putative Long Noncoding RNA Regulates Muscle Performance. *Cell* 160(4), 595–606.  
542 DOI: 10.1016/j.cell.2015.01.009.
- 543 Angelantonio, E.D., Bhupathiraju, S.N., Wormser, D., Gao, P., Kaptoge, S., Gonzalez, A.B.d., Cairns,  
544 B.J., Huxley, R., Jackson, C.L., Joshy, G., Lewington, S., Manson, J.E., Murphy, N., Patel, A.V., Samet,  
545 J.M., Woodward, M., Zheng, W., Zhou, M., Bansal, N., Barricarte, A. et al. (20th Aug. 2016). Body-  
546 mass index and all-cause mortality: individual-participant-data meta-analysis of 239 prospective  
547 studies in four continents. *The Lancet* 388(10046). Publisher: Elsevier, 776–786. DOI: 10.1016/  
548 S0140-6736(16)30175-1.
- 549 Bai, Z., Chai, X.-r., Yoon, M.J., Kim, H.-J., Lo, K.A., Zhang, Z.-c., Xu, D., Siang, D.T.C., Walet, A.C.E.,  
550 Xu, S.-h., Chia, S.-Y., Chen, P., Yang, H., Ghosh, S. and Sun, L. (1st Aug. 2017). Dynamic tran-  
551 scriptome changes during adipose tissue energy expenditure reveal critical roles for long non-  
552 coding RNA regulators. *PLOS Biology* 15(8). tex.ids: bai\_dynamic\_2017, e2002176. DOI: 10.1371/  
553 journal.pbio.2002176.
- 554 Bast-Habersbrunner, A., Kiefer, C., Weber, P., Fromme, T., SchieSSL, A., Schwalie, P.C., Deplancke, B.,  
555 Li, Y. and Klingenspor, M. (31st May 2021). LncRNA Ctflos orchestrates transcription and altern-  
556 ative splicing in thermogenic adipogenesis. *EMBO reports* n/a (n/a). Publisher: John Wiley & Sons,  
557 Ltd, e51289. DOI: 10.15252/embr.202051289.
- 558 Betz, M.J. and Enerbäck, S. (23rd Oct. 2017). Targeting thermogenesis in brown fat and muscle to  
559 treat obesity and metabolic disease. *Nature Reviews Endocrinology*, nrendo.2017.132. DOI: 10.  
560 1038/nrendo.2017.132.
- 561 Cannon, B. and Nedergaard, J. (1st Jan. 2004). Brown Adipose Tissue: Function and Physiological  
562 Significance. *Physiological Reviews* 84(1), 277–359. DOI: 10.1152/physrev.00015.2003.
- 563 Derrien, T., Johnson, R., Bussotti, G., Tanzer, A., Djebali, S., Tilgner, H., Guernec, G., Martin, D.,  
564 Merkel, A., Knowles, D.G., Lagarde, J., Veeravalli, L., Ruan, X., Ruan, Y., Lassmann, T., Carninci, P.,  
565 Brown, J.B., Lipovich, L., Gonzalez, J.M., Thomas, M. et al. (9th Jan. 2012). The GENCODE v7 cata-  
566 log of human long noncoding RNAs: Analysis of their gene structure, evolution, and expression.  
567 *Genome Res.* 22(9), 1775–1789. DOI: 10.1101/gr.132159.111.
- 568 Djebali, S., Davis, C.A., Merkel, A., Dobin, A., Lassmann, T., Mortazavi, A., Tanzer, A., Lagarde, J.,  
569 Lin, W., Schlesinger, F., Xue, C., Marinov, G.K., Khatun, J., Williams, B.A., Zaleski, C., Rozowsky, J.,



- 570 Röder, M., Kokocinski, F., Abdelhamid, R.F., Alioto, T. et al. (Sept. 2012). Landscape of transcrip-  
571 tion in human cells. *Nature* 489(7414). tex.ids: djebali\_landscape\_2012, 101–108. DOI: 10 . 1038 /  
572 nature11233.
- 573 Dobin, A., Davis, C.A., Schlesinger, F., Drenkow, J., Zaleski, C., Jha, S., Batut, P., Chaisson, M. and  
574 Gingeras, T.R. (1st Jan. 2013). STAR: ultrafast universal RNA-seq aligner. *Bioinformatics* 29(1), 15–  
575 21. DOI: 10.1093/bioinformatics/bts635.
- 576 Doench, J.G., Hartenian, E., Graham, D.B., Tothova, Z., Hegde, M., Smith, I., Sullender, M., Ebert,  
577 B.L., Xavier, R.J. and Root, D.E. (Dec. 2014). Rational design of highly active sgRNAs for CRISPR-  
578 Cas9-mediated gene inactivation. *Nat Biotechnol* 32(12), 1262–1267. DOI: 10.1038/nbt.3026.
- 579 Galarraga, M., Campión, J., Muñoz-Barrutia, A., Boqué, N., Moreno, H., Martínez, J.A., Milagro, F.  
580 and Ortiz-de-Solórzano, C. (Dec. 2012). Adiposoft: automated software for the analysis of white  
581 adipose tissue cellularity in histological sections. *J Lipid Res* 53(12), 2791–2796. DOI: 10.1194/jlr.  
582 D023788.
- 583 Gil, N. and Ulitsky, I. (28th Nov. 2018). Production of Spliced Long Noncoding RNAs Specifies Re-  
584 gions with Increased Enhancer Activity. *Cell Systems* 7(5), 537–547.e3. DOI: 10 . 1016 / j . c e l s .  
585 2018.10.009.
- 586 Gil, N. and Ulitsky, I. (15th Nov. 2019). Regulation of gene expression by cis -acting long non-coding  
587 RNAs. *Nat Rev Genet*, 1–16. DOI: 10 . 1038 / s41576 -019 -0184 -5.
- 588 Goudarzi, M., Berg, K., Pieper, L.M. and Schier, A.F. (8th Jan. 2019). Individual long non-coding RNAs  
589 have no overt functions in zebrafish embryogenesis, viability and fertility. *eLife* 8. Ed. by E.M.  
590 Busch-Nentwich and D.Y. Stainier. Publisher: eLife Sciences Publications, Ltd, e40815. DOI: 10 .  
591 7554/eLife.40815.
- 592 Guerra, C., Navarro, P., Valverde, A.M., Arribas, M., Brüning, J., Kozak, L.P., Kahn, C.R. and Benito,  
593 M. (15th Oct. 2001). Brown adipose tissuespecific insulin receptor knockout shows diabetic phen-  
594 otype without insulin resistance. *J Clin Invest* 108(8). Publisher: American Society for Clinical In-  
595 vestigation, 1205–1213. DOI: 10 . 1172 / JCI13103.
- 596 Han, X., Luo, S., Peng, G., Lu, J.Y., Cui, G., Liu, L., Yan, P., Yin, Y., Liu, W., Wang, R., Zhang, J., Ai,  
597 S., Chang, Z., Na, J., He, A., Jing, N. and Shen, X. (1st Apr. 2018). Mouse knockout models reveal  
598 largely dispensable but context-dependent functions of lncRNAs during development. *Journal of*  
599 *Molecular Cell Biology* 10(2), 175–178. DOI: 10.1093/jmcb/mjy003.
- 600 Henriques, F., Bedard, A.H., Guilherme, A., Kelly, M., Chi, J., Zhang, P., Lifshitz, L.M., Bellvé, K.,  
601 Rowland, L.A., Yenilmez, B., Kumar, S., Wang, Y., Luban, J., Weinstein, L.S., Lin, J.D., Cohen, P.  
602 and Czech, M.P. (4th Aug. 2020). Single-Cell RNA Profiling Reveals Adipocyte to Macrophage  
603 Signaling Sufficient to Enhance Thermogenesis. *Cell Rep* 32(5), 107998. DOI: 10 . 1016 / j . c e l r e p .  
604 2020.107998.
- 605 Hughes, M.R., Canals Hernaez, D., Cait, J., Refaeli, I., Lo, B.C., Roskelley, C.D. and McNagny, K.M.  
606 (1st June 2020). A sticky wicket: Defining molecular functions for CD34 in hematopoietic cells.  
607 *Experimental Hematology* 86, 1–14. DOI: 10.1016/j.exphem.2020.05.004.
- 608 Ji, Z., Song, R., Regev, A. and Struhl, K. (19th Dec. 2015). Many lncRNAs, 5UTRs, and pseudogenes  
609 are translated and some are likely to express functional proteins. *eLife Sciences* 4, e08890. DOI:  
610 10.7554/eLife.08890.
- 611 Klepac, K., Georgiadi, A., Tschöp, M. and Herzig, S. (16th July 2019). The role of brown and beige  
612 adipose tissue in glycaemic control. *Molecular Aspects of Medicine*. DOI: 10 . 1016 / j . m a m . 2019 .  
613 07 . 001.



- 614 Konermann, S., Brigham, M.D., Trevino, A.E., Joung, J., Abudayyeh, O.O., Barcena, C., Hsu, P.D.,  
615 Habib, N., Gootenberg, J.S., Nishimasu, H., Nureki, O. and Zhang, F. (Jan. 2015). Genome-scale  
616 transcriptional activation by an engineered CRISPR-Cas9 complex. *Nature* 517(7536), 583–588. DOI:  
617 10.1038/nature14136.
- 618 Langmead, B. and Salzberg, S.L. (Apr. 2012). Fast gapped-read alignment with Bowtie 2. *Nature*  
619 *Methods* 9(4), 357–359. DOI: 10.1038/nmeth.1923.
- 620 Love, M.I., Huber, W. and Anders, S. (5th Dec. 2014). Moderated estimation of fold change and dis-  
621 persion for RNA-seq data with DESeq2. *Genome Biology* 15, 550. DOI: 10.1186/s13059-014-  
622 0550-8.
- 623 Lowell, B.B., S-Susulic, V., Hamann, A., Lawitts, J.A., Himms-Hagen, J., Boyer, B.B., Kozak, L.P. and  
624 Flier, J.S. (Dec. 1993). Development of obesity in transgenic mice after genetic ablation of brown  
625 adipose tissue. *Nature* 366(6457). Bandiera\_abtest: a Cg\_type: Nature Research Journals Num-  
626 ber: 6457 Primary\_atype: Research Publisher: Nature Publishing Group, 740–742. DOI: 10.1038/  
627 366740a0.
- 628 Lundh, M., Plucińska, K., Isidor, M.S., Petersen, P.S.S. and Emanuelli, B. (1st Oct. 2017). Bidirectional  
629 manipulation of gene expression in adipocytes using CRISPRa and siRNA. *Molecular Metabolism*  
630 6(10), 1313–1320. DOI: 10.1016/j.molmet.2017.07.001.
- 631 Maffei, M., Barone, I., Scabia, G. and Santini, F. (Aug. 2016). The Multifaceted Haptoglobin in the  
632 Context of Adipose Tissue and Metabolism. *Endocr Rev* 37(4), 403–416. DOI: 10.1210/er.2016-  
633 1009.
- 634 Martin, M. (2nd May 2011). Cutadapt removes adapter sequences from high-throughput sequencing  
635 reads. *EMBnet journal* 17(1). Number: 1, 10–12. DOI: 10.14806/ej.17.1.200.
- 636 Matsui, M. and Corey, D.R. (Mar. 2017). Perspectives: Noncoding RNAs as drug targets. *Nat Rev*  
637 *Drug Discov* 16(3), 167–179. DOI: 10.1038/nrd.2016.117.
- 638 Natoli, G. and Andrau, J.-C. (2012). Noncoding Transcription at Enhancers: General Principles and  
639 Functional Models. *Annual Review of Genetics* 46(1), 1–19. DOI: 10.1146/annurev-genet-110711-  
640 155459.
- 641 NCD Risk Factor Collaboration (NCD-RisC) (2nd Apr. 2016). Trends in adult body-mass index in 200  
642 countries from 1975 to 2014: a pooled analysis of 1698 population-based measurement studies with  
643 19½ million participants. *Lancet* 387(10026), 1377–1396. DOI: 10.1016/S0140-6736(16)30054-X.
- 644 Nedergaard, J., Bengtsson, T. and Cannon, B. (1st Aug. 2007). Unexpected evidence for active brown  
645 adipose tissue in adult humans. *American Journal of Physiology - Endocrinology and Metabolism*  
646 293(2), E444–E452. DOI: 10.1152/ajpendo.00691.2006.
- 647 Nguyen, T.C., Zaleta-Rivera, K., Huang, X., Dai, X. and Zhong, S. (Nov. 2018). RNA, Action through  
648 Interactions. *Trends Genet.* 34(11), 867–882. DOI: 10.1016/j.tig.2018.08.001.
- 649 Patro, R., Duggal, G., Love, M.I., Irizarry, R.A. and Kingsford, C. (Apr. 2017). Salmon provides fast  
650 and bias-aware quantification of transcript expression. *Nature Methods* 14(4), 417–419. DOI: 10.  
651 1038/nmeth.4197.
- 652 Pradas-Juni, M., Hansmeier, N.R., Link, J.C., Schmidt, E., Larsen, B.D., Klemm, P., Meola, N., Topel,  
653 H., Loureiro, R., Dhaouadi, I., Kiefer, C.A., Schwarzer, R., Khani, S., Oliverio, M., Awazawa, M.,  
654 Frommolt, P., Heeren, J., Scheja, L., Heine, M., Dieterich, C. et al. (31st Jan. 2020). A MAFG-lncRNA  
655 axis links systemic nutrient abundance to hepatic glucose metabolism. *Nat Commun* 11(1), 1–17.  
656 DOI: 10.1038/s41467-020-14323-y.

- 657 Prospective Studies Collaboration (28th Mar. 2009). Body-mass index and cause-specific mortality in  
658 900 000 adults: collaborative analyses of 57 prospective studies. *The Lancet* 373(9669), 1083–1096.  
659 DOI: 10.1016/S0140-6736(09)60318-4.
- 660 Qian, W., Liao, B.-Y., Chang, A.Y.-F. and Zhang, J. (1st Oct. 2010). Maintenance of duplicate genes  
661 and their functional redundancy by reduced expression. *Trends in Genetics* 26(10), 425–430. DOI:  
662 10.1016/j.tig.2010.07.002.
- 663 Rosen, E.D. and Spiegelman, B.M. (16th Jan. 2014). What We Talk About When We Talk About Fat.  
664 *Cell* 156(1), 20–44. DOI: 10.1016/j.cell.2013.12.012.
- 665 Rui, L. (12th Sept. 2017). Brown and Beige Adipose Tissues in Health and Disease. *Compr Physiol*  
666 7(4), 1281–1306. DOI: 10.1002/cphy.c170001.
- 667 Sanchez-Gurmaches, J., Hung, C.-M. and Guertin, D.A. (May 2016). Emerging Complexities in Adipo-  
668 cyte Origins and Identity. *Trends in Cell Biology* 26(5), 313–326. DOI: 10.1016/j.tcb.2016.01.004.
- 669 Scheele, C. and Wolfrum, C. (1st Feb. 2020). Brown Adipose Crosstalk in Tissue Plasticity and Human  
670 Metabolism. *Endocrine Reviews* 41(1), 53–65. DOI: 10.1210/endrev/bnz007.
- 671 Schmidt, E., Dhaouadi, I., Gaziano, I., Oliverio, M., Klemm, P., Awazawa, M., Mitterer, G., Fernandez-  
672 Rebollo, E., Pradas-Juni, M., Wagner, W., Hammerschmidt, P., Loureiro, R., Kiefer, C., Hansmeier,  
673 N.R., Khani, S., Bergami, M., Heine, M., Ntini, E., Frommolt, P., Zentis, P. et al. (6th Sept. 2018).  
674 LincRNA H19 protects from dietary obesity by constraining expression of monoallelic genes in  
675 brown fat. *Nature Communications* 9(1), 3622. DOI: 10.1038/s41467-018-05933-8.
- 676 Seale, P., Conroe, H.M., Estall, J., Kajimura, S., Frontini, A., Ishibashi, J., Cohen, P., Cinti, S. and  
677 Spiegelman, B.M. (4th Jan. 2011). Prdm16 determines the thermogenic program of subcutaneous  
678 white adipose tissue in mice. *J Clin Invest* 121(1). Publisher: American Society for Clinical Invest-  
679 igation, 96–105. DOI: 10.1172/JCI44271.
- 680 Seale, P., Kajimura, S., Yang, W., Chin, S., Rohas, L.M., Uldry, M., Tavernier, G., Langin, D. and  
681 Spiegelman, B.M. (July 2007). Transcriptional control of brown fat determination by PRDM16. *Cell*  
682 *Metab* 6(1), 38–54. DOI: 10.1016/j.cmet.2007.06.001.
- 683 Siersbæk, M.S., Loft, A., Aagaard, M.M., Nielsen, R., Schmidt, S.F., Petrovic, N., Nedergaard, J. and  
684 Mandrup, S. (9th Jan. 2012). Genome-Wide Profiling of Peroxisome Proliferator-Activated Receptor  
685 in Primary Epididymal, Inguinal, and Brown Adipocytes Reveals Depot-Selective Binding Correlat-  
686 ed with Gene Expression. *Mol. Cell. Biol.* 32(17), 3452–3463. DOI: 10.1128/MCB.00526-12.
- 687 Sommer, G., Weise, S., Kralisch, S., Lossner, U., Bluher, M., Stumvoll, M. and Fasshauer, M. (2009).  
688 Lipocalin-2 is induced by interleukin-1 in murine adipocytes in vitro. *Journal of Cellular Bio-*  
689 *chemistry* 106(1). \_eprint: <https://onlinelibrary.wiley.com/doi/pdf/10.1002/jcb.21980>, 103–108.  
690 DOI: 10.1002/jcb.21980.
- 691 Sommer, G., Weise, S., Kralisch, S., Scherer, P.E., Lössner, U., Blüher, M., Stumvoll, M. and Fasshauer,  
692 M. (2008). The adipokine SAA3 is induced by interleukin-1 in mouse adipocytes. *Journal of Cellular*  
693 *Biochemistry* 104(6). \_eprint: <https://onlinelibrary.wiley.com/doi/pdf/10.1002/jcb.21782>, 2241–  
694 2247. DOI: 10.1002/jcb.21782.
- 695 Sun, L., Goff, L.A., Trapnell, C., Alexander, R., Lo, K.A., Hacisuleyman, E., Sauvageau, M., Tazon-  
696 Vega, B., Kelley, D.R., Hendrickson, D.G., Yuan, B., Kellis, M., Lodish, H.F. and Rinn, J.L. (26th Feb.  
697 2013). Long noncoding RNAs regulate adipogenesis. *PNAS* 110(9), 3387–3392. DOI: 10.1073/pnas.  
698 1222643110.

- 699 Sun, L. and Lin, J.D. (1st May 2019). Function and Mechanism of Long Noncoding RNAs in Adipo-  
700 cyte Biology. *Diabetes* 68(5). Publisher: American Diabetes Association Section: Perspectives in  
701 Diabetes, 887–896. DOI: 10.2337/dbi18-0009.
- 702 Wahlestedt, C. (June 2013). Targeting long non-coding RNA to therapeutically upregulate gene ex-  
703 pression. *Nat Rev Drug Discov* 12(6). Bandiera\_abtest: a Cg\_type: Nature Research Journals Num-  
704 ber: 6 Primary\_atype: Reviews Publisher: Nature Publishing Group Subject\_term: Cancer;RNAi;Tech-  
705 nology Subject\_term\_id: cancer;rnai;technology, 433–446. DOI: 10.1038/nrd4018.
- 706 Wang, L., Park, H.J., Dasari, S., Wang, S., Kocher, J.-P. and Li, W. (1st Apr. 2013). CPAT: Coding-  
707 Potential Assessment Tool using an alignment-free logistic regression model. *Nucleic Acids Res*  
708 41(6), e74–e74. DOI: 10.1093/nar/gkt006.
- 709 Yao, R.-W., Wang, Y. and Chen, L.-L. (May 2019). Cellular functions of long noncoding RNAs. *Nat Cell*  
710 *Biol* 21(5). Bandiera\_abtest: a Cg\_type: Nature Research Journals Number: 5 Primary\_atype: Re-  
711 views Publisher: Nature Publishing Group Subject\_term: Chromatin;Long non-coding RNAs;RNA  
712 metabolism Subject\_term\_id: chromatin;long-non-coding-rnas;rna-metabolism, 542–551. DOI: 10.  
713 1038/s41556-019-0311-8.
- 714 Yi, W., Li, J., Zhu, X., Wang, X., Fan, L., Sun, W., Liao, L., Zhang, J., Li, X., Ye, J., Chen, F., Taipale, J.,  
715 Chan, K.M., Zhang, L. and Yan, J. (July 2020). CRISPR-assisted detection of RNAprotein interac-  
716 tions in living cells. *Nature Methods* 17(7). Number: 7 Publisher: Nature Publishing Group, 685–  
717 688. DOI: 10.1038/s41592-020-0866-0.
- 718 Yu, G. and He, Q.-Y. (26th Jan. 2016). ReactomePA: an R/Bioconductor package for reactome pathway  
719 analysis and visualization. *Mol. BioSyst.* 12(2), 477–479. DOI: 10.1039/C5MB00663E.
- 720 Zhang, B., Yang, Y., Xiang, L., Zhao, Z. and Ye, R. (2019). Adipose-derived exosomes: A novel adipokine  
721 in obesity-associated diabetes. *Journal of Cellular Physiology* 234(10). \_eprint: [https://onlinelib-](https://onlinelibrary.wiley.com/doi/pdf/10.1002/jcp.28354)  
722 [rary.wiley.com/doi/pdf/10.1002/jcp.28354](https://onlinelibrary.wiley.com/doi/pdf/10.1002/jcp.28354), 16692–16702. DOI: 10.1002/jcp.28354.
- 723 Zhu, A., Ibrahim, J.G. and Love, M.I. (2018). Heavy-tailed prior distributions for sequence count data:  
724 removing the noise and preserving large differences. *Bioinformatics*. DOI: 10.1093/bioinformatics/  
725 bty895.

726 **12 Figures**

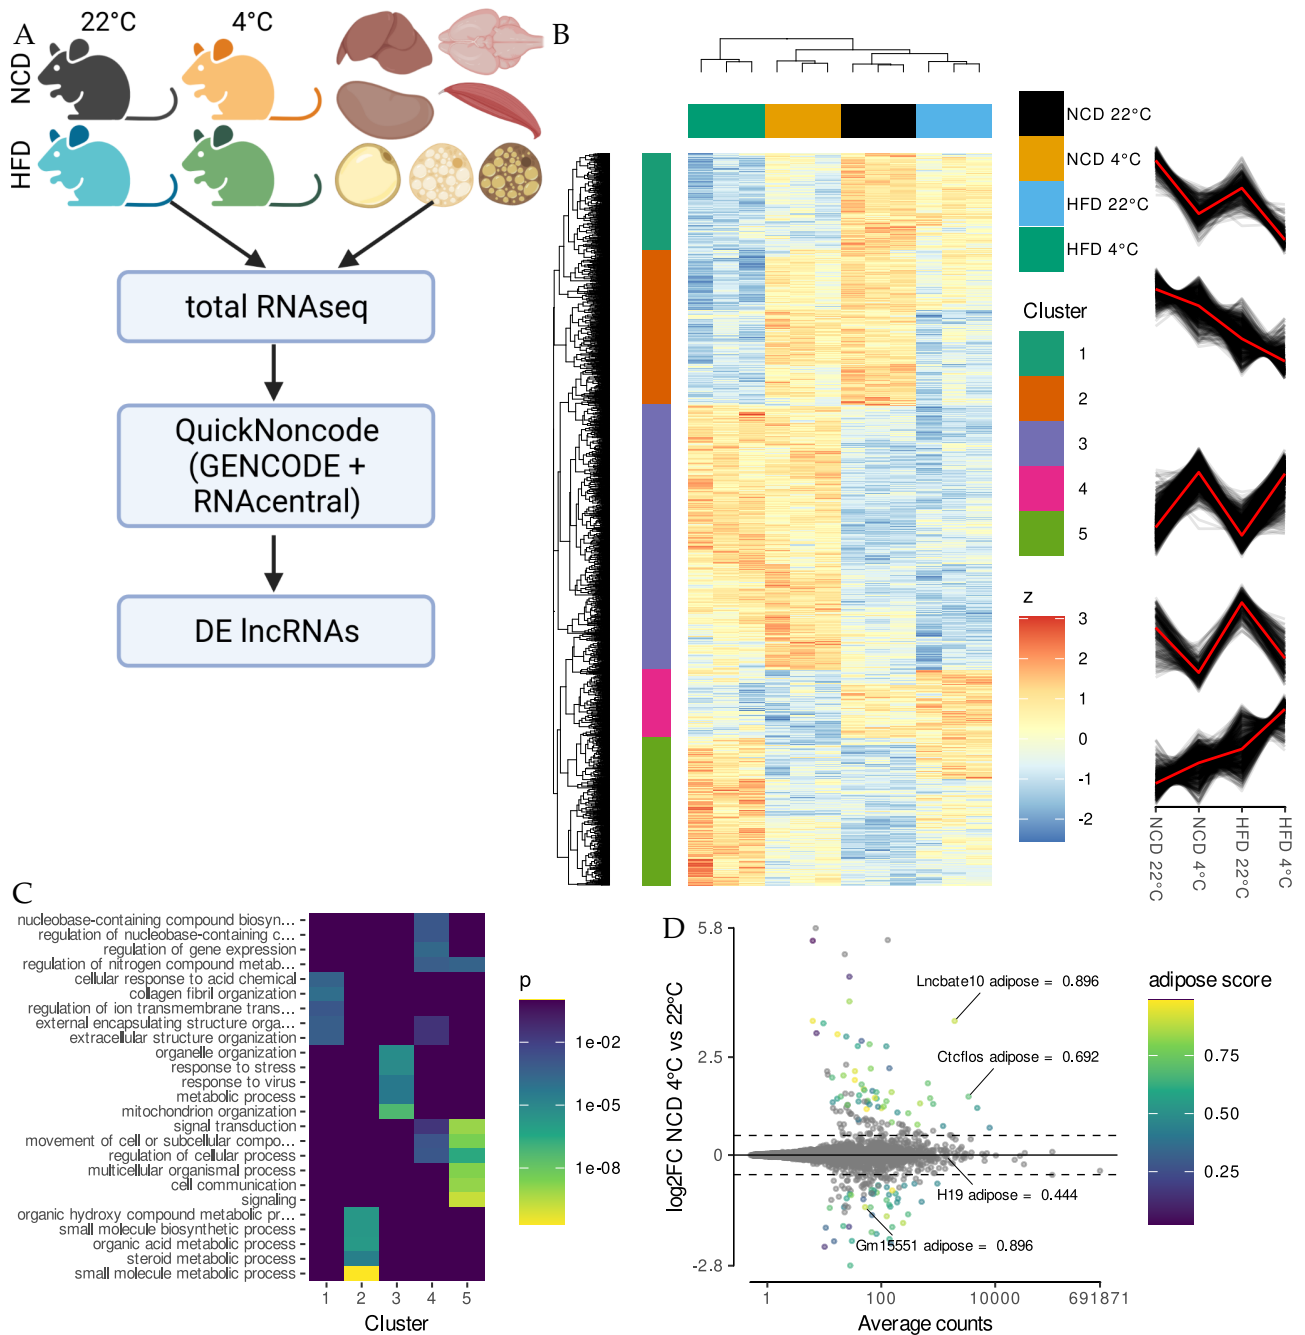

727

728 **Figure 1: RNA-Seq reveals temperature and obesity dependent changes in iBAT lncRNA expression.**

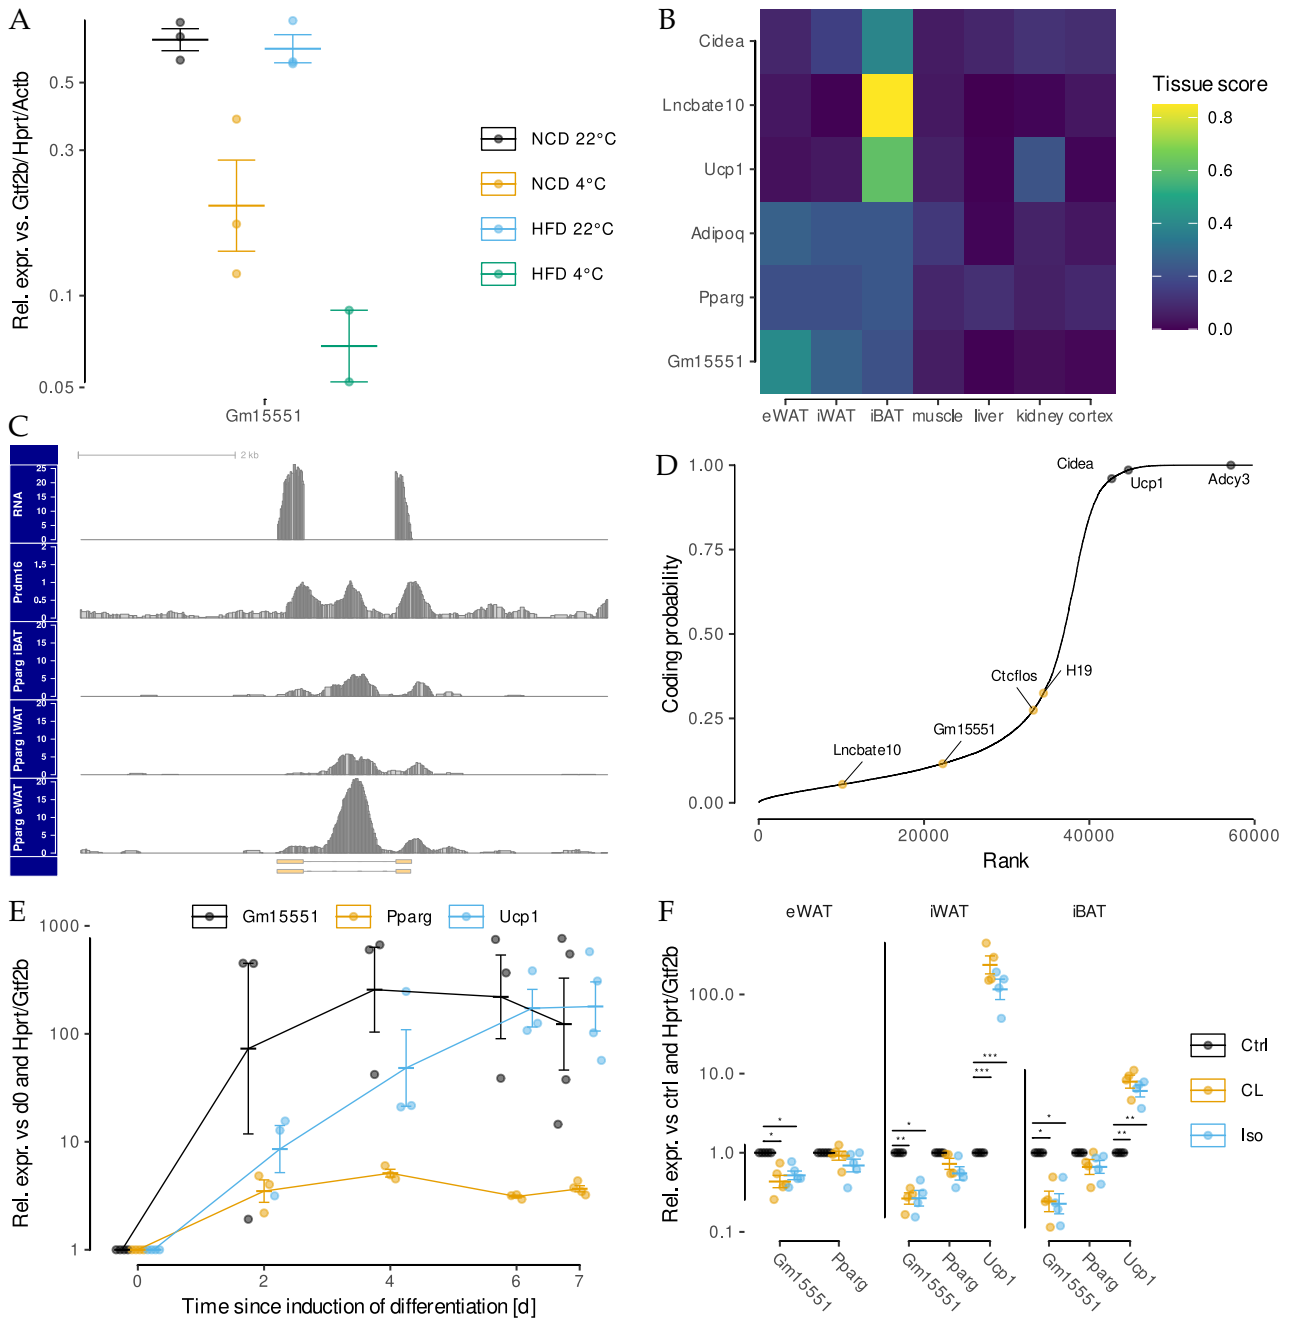

729

730

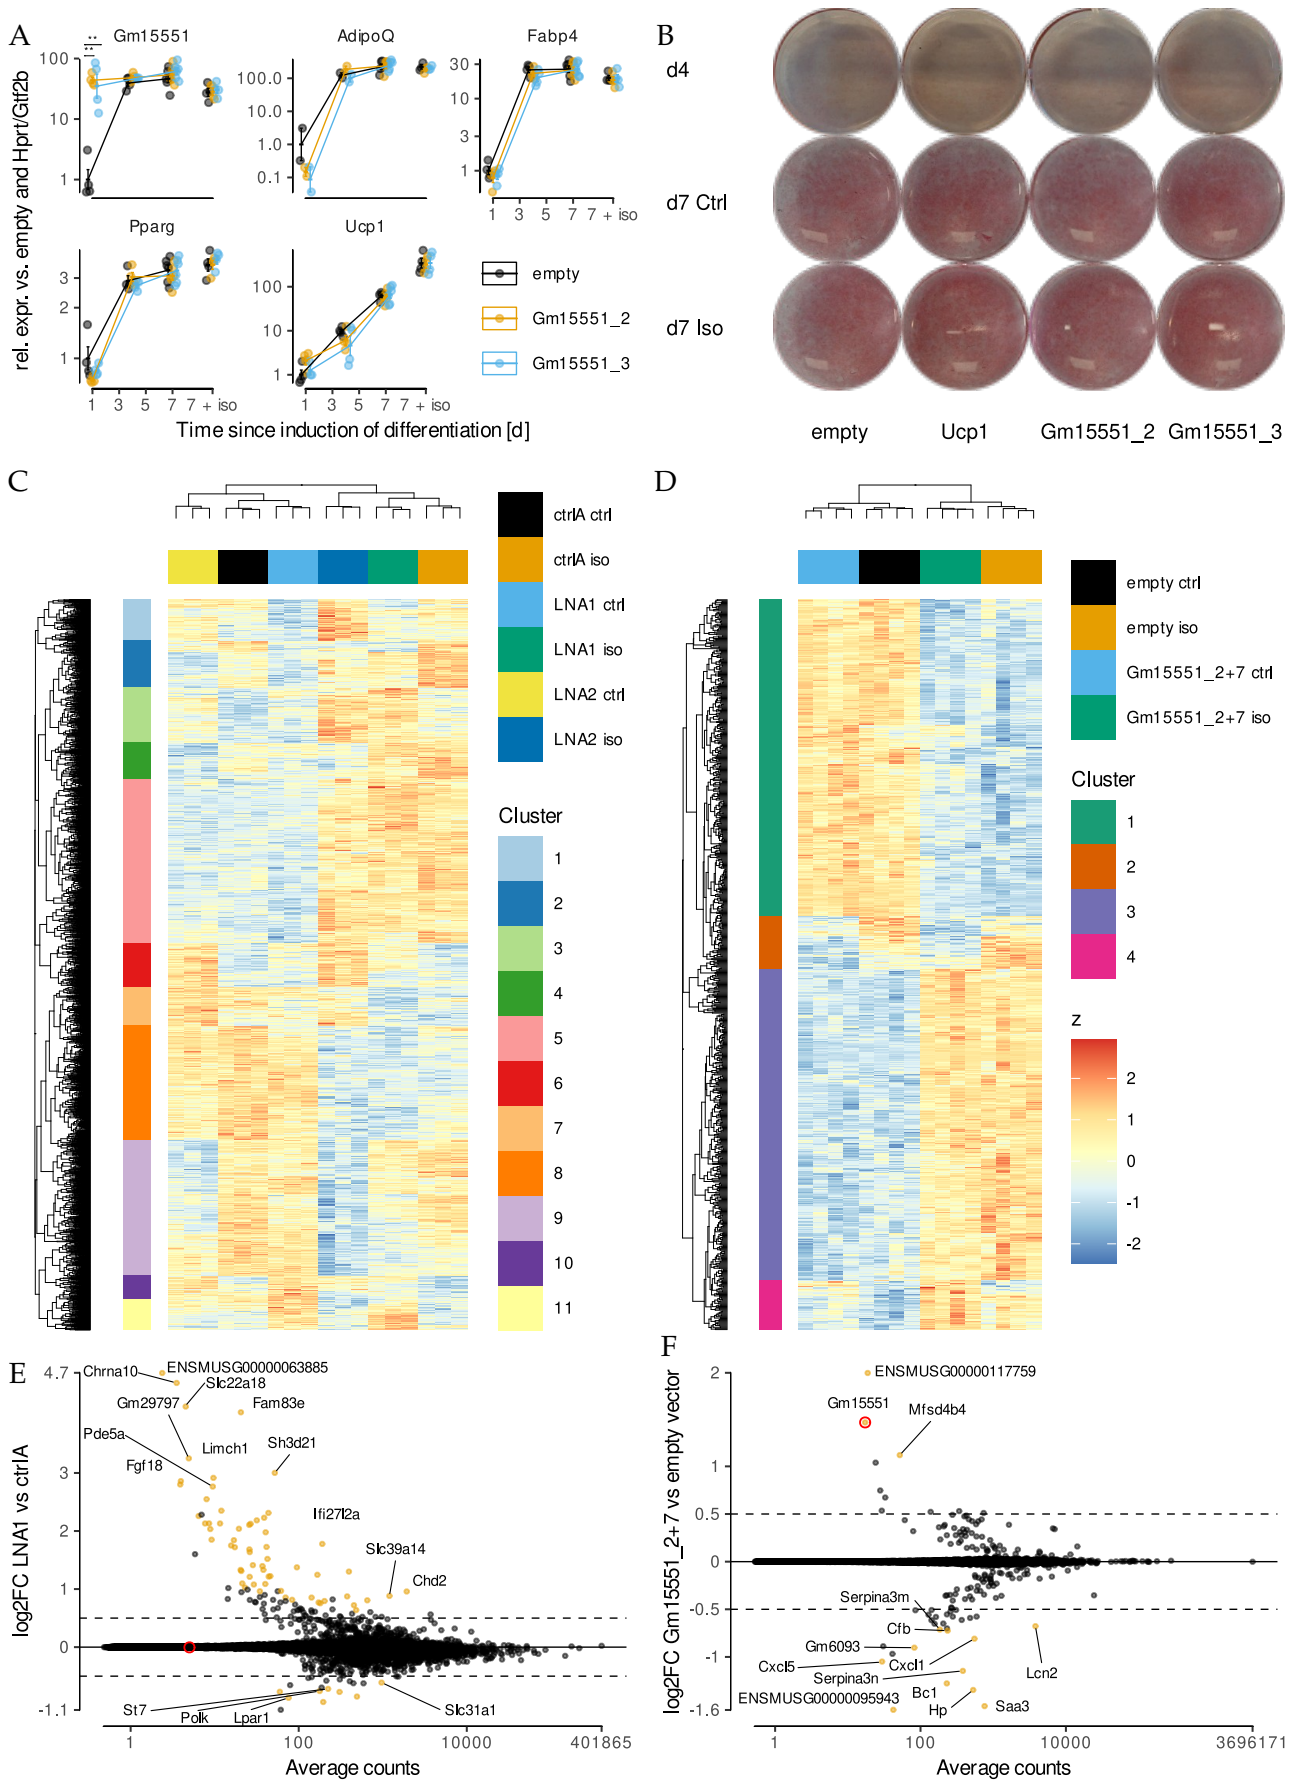

Figure 3: *Gm15551* is dispensable for iBAT function *in vitro*.

731

732



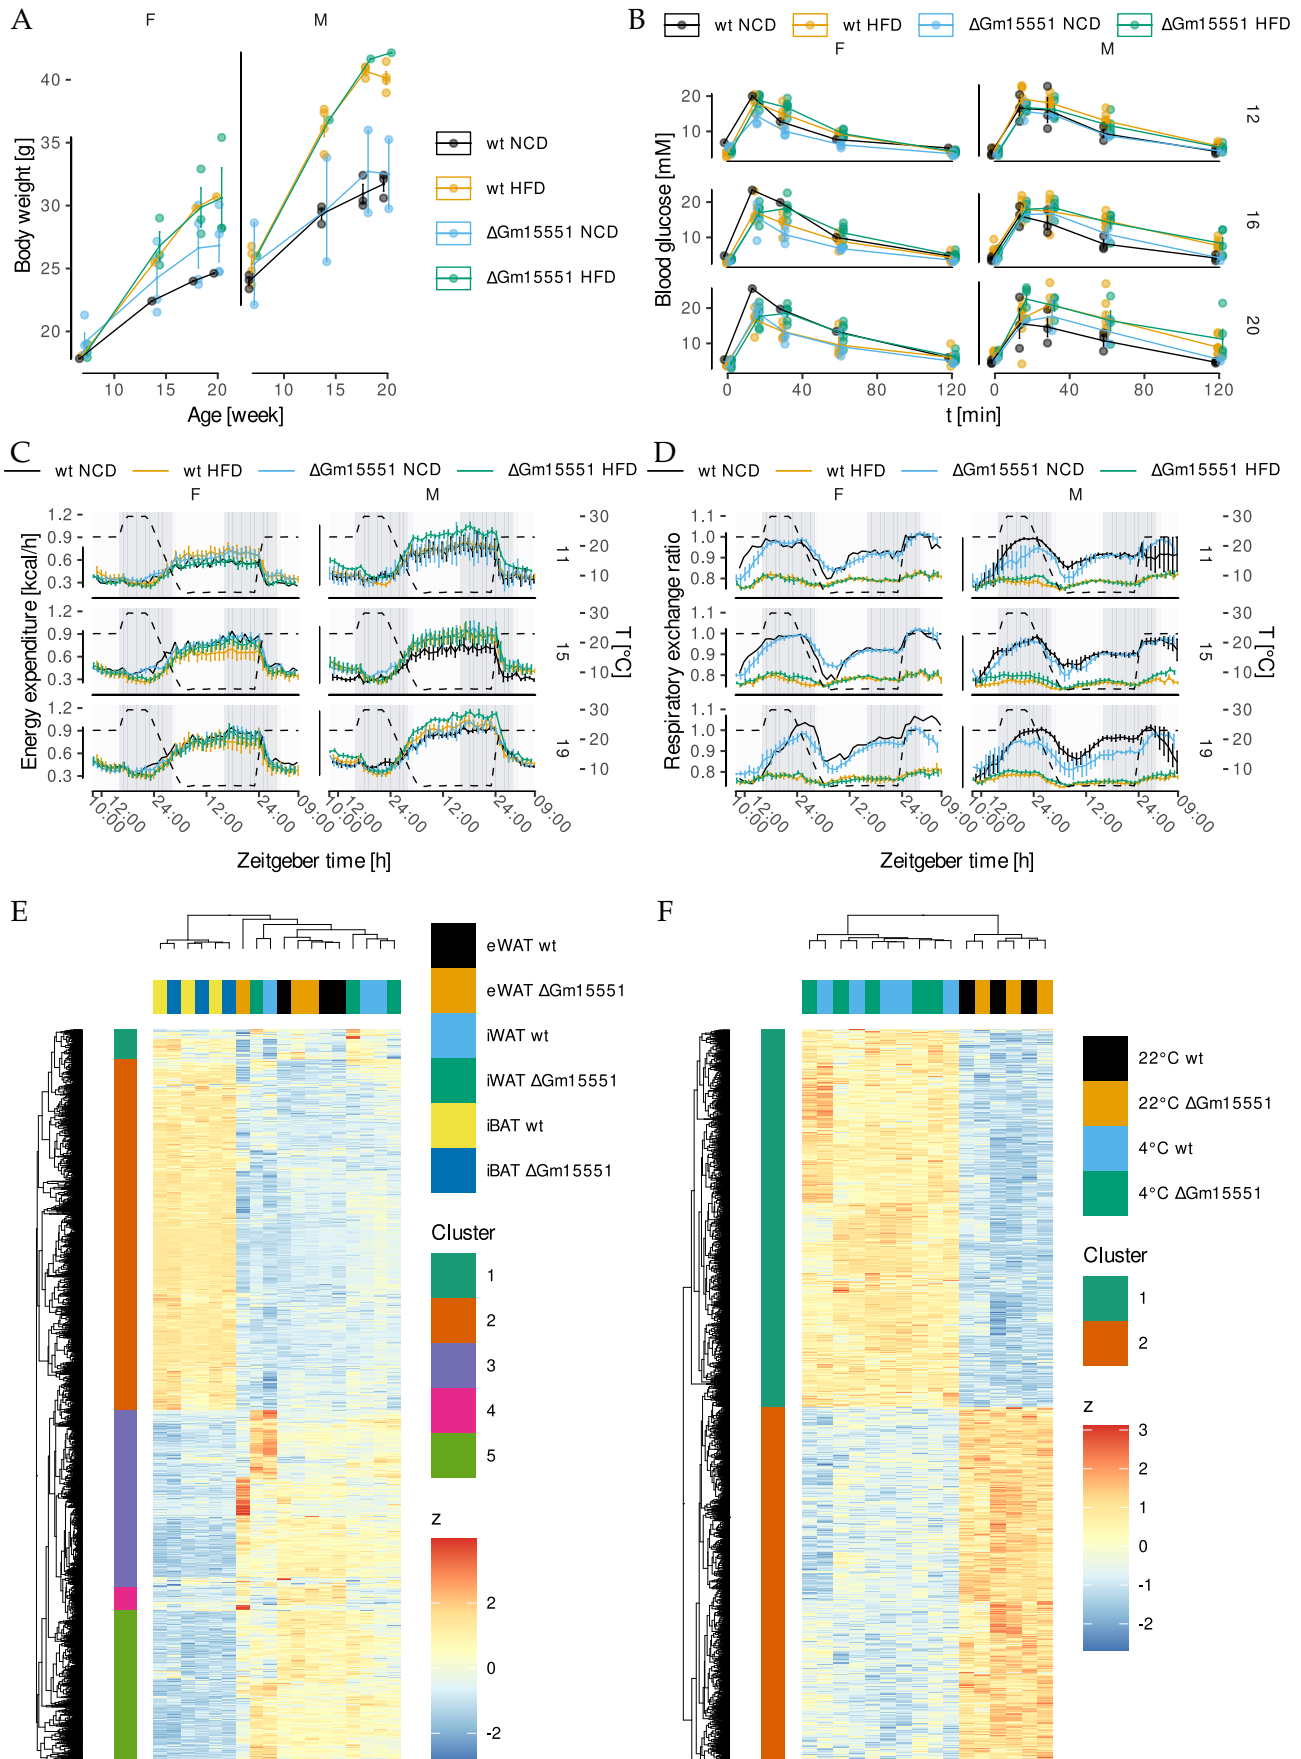

Figure 4: *Gm1551* is dispensable for iBAT function *in vivo*.

733

734

735 **13 Supplementary figures**

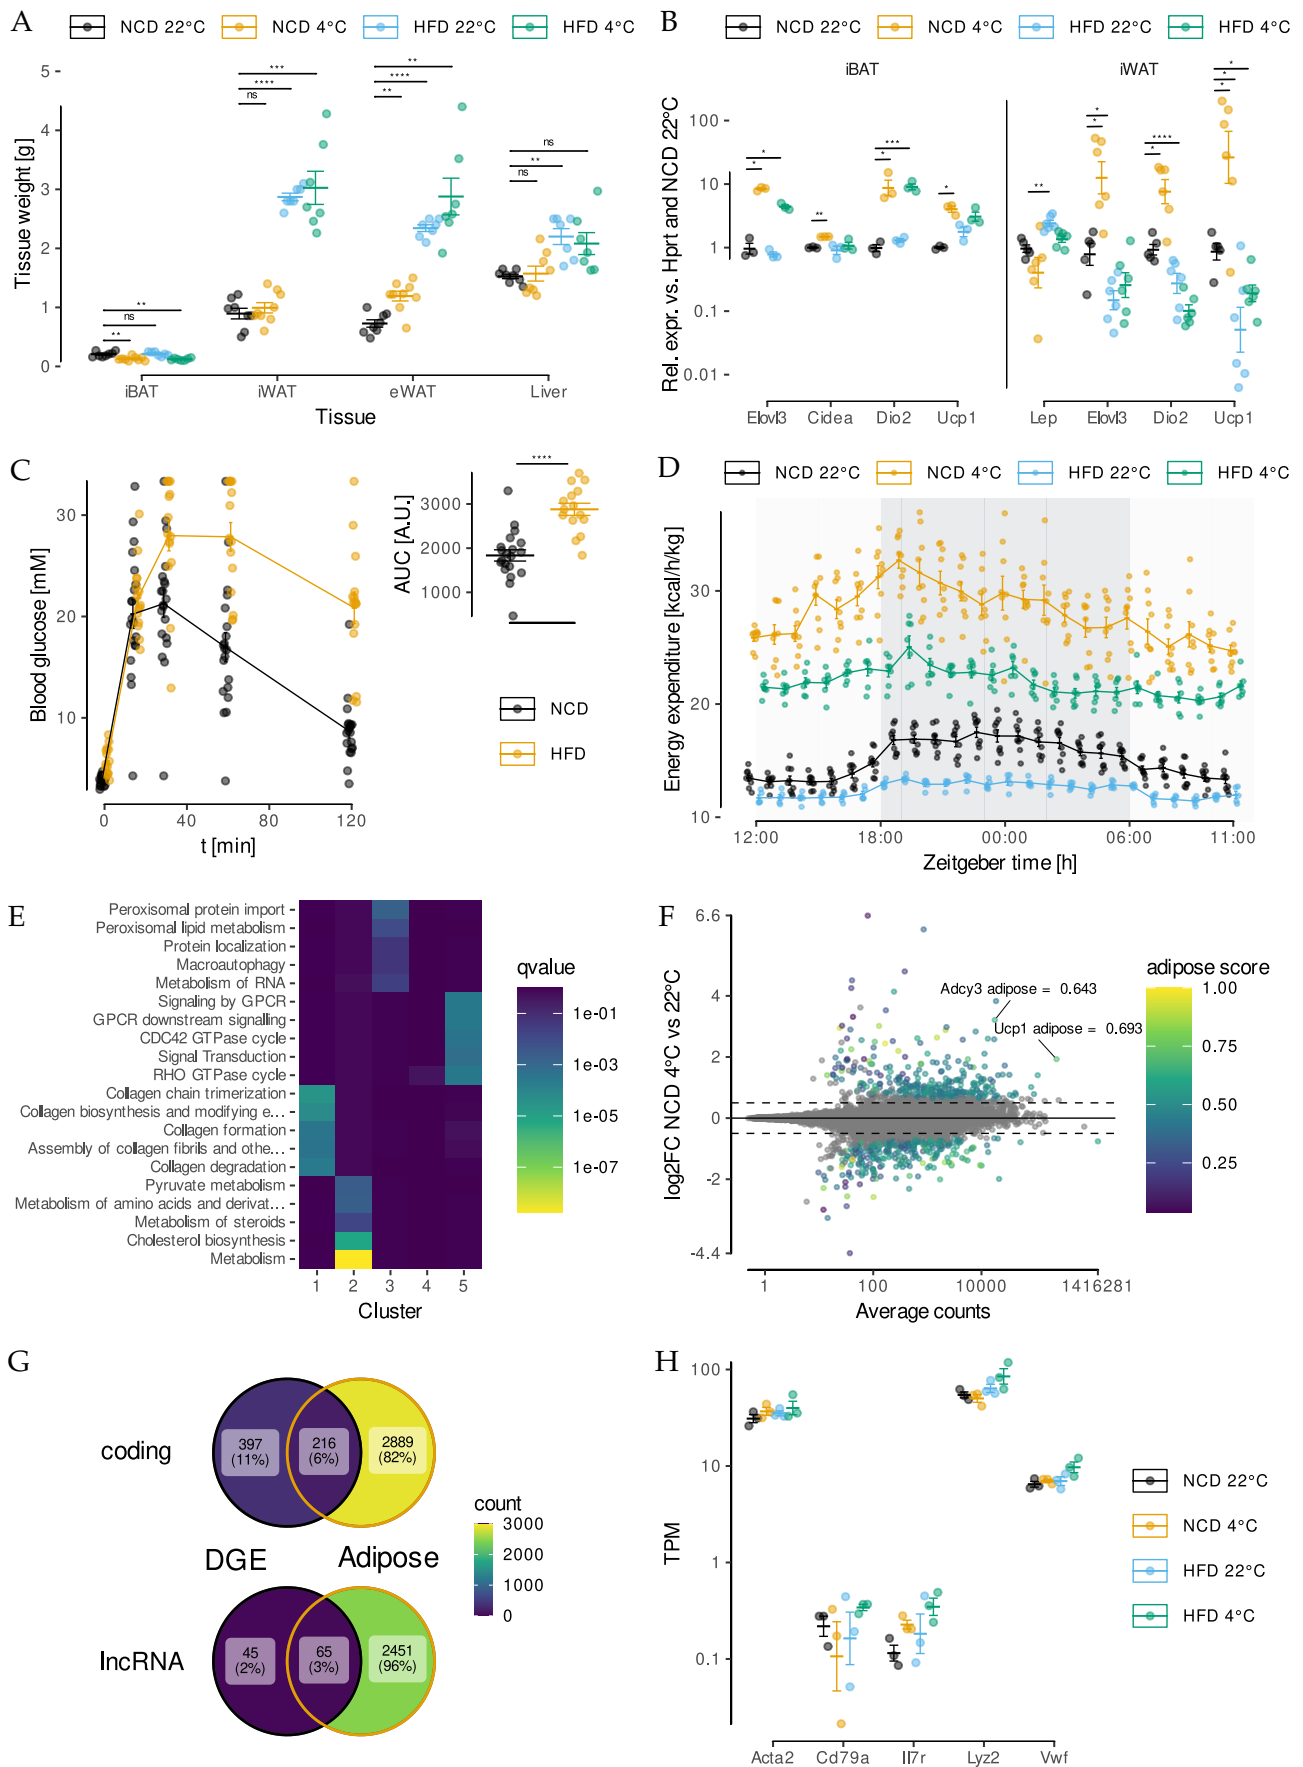

736

737 **Figure S1: RNA-Seq reveals temperature and obesity dependent changes in iBAT lncRNA expression.**

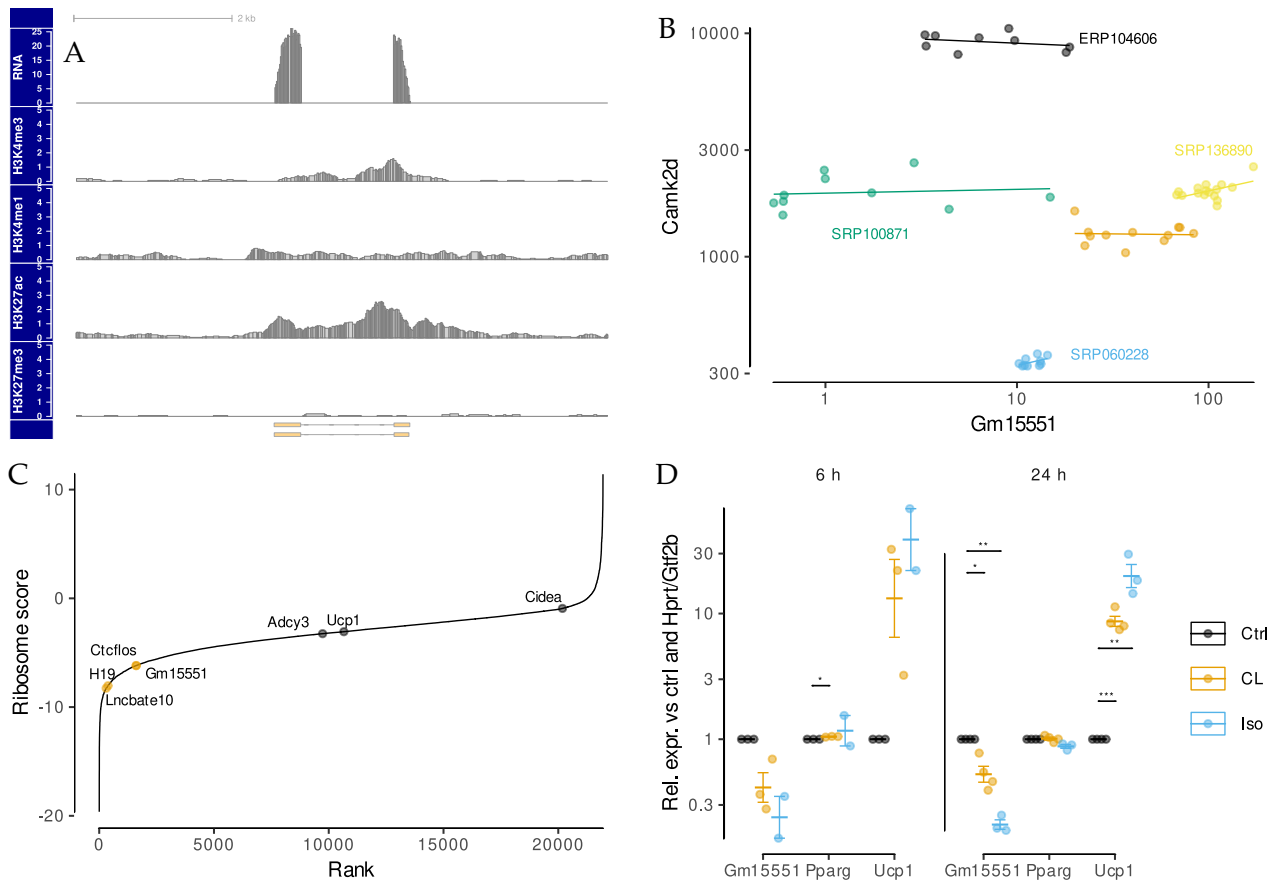

738

739

Figure S2: *Gm15551* is an adipose tissue specific, diet and temperature regulated lncRNA

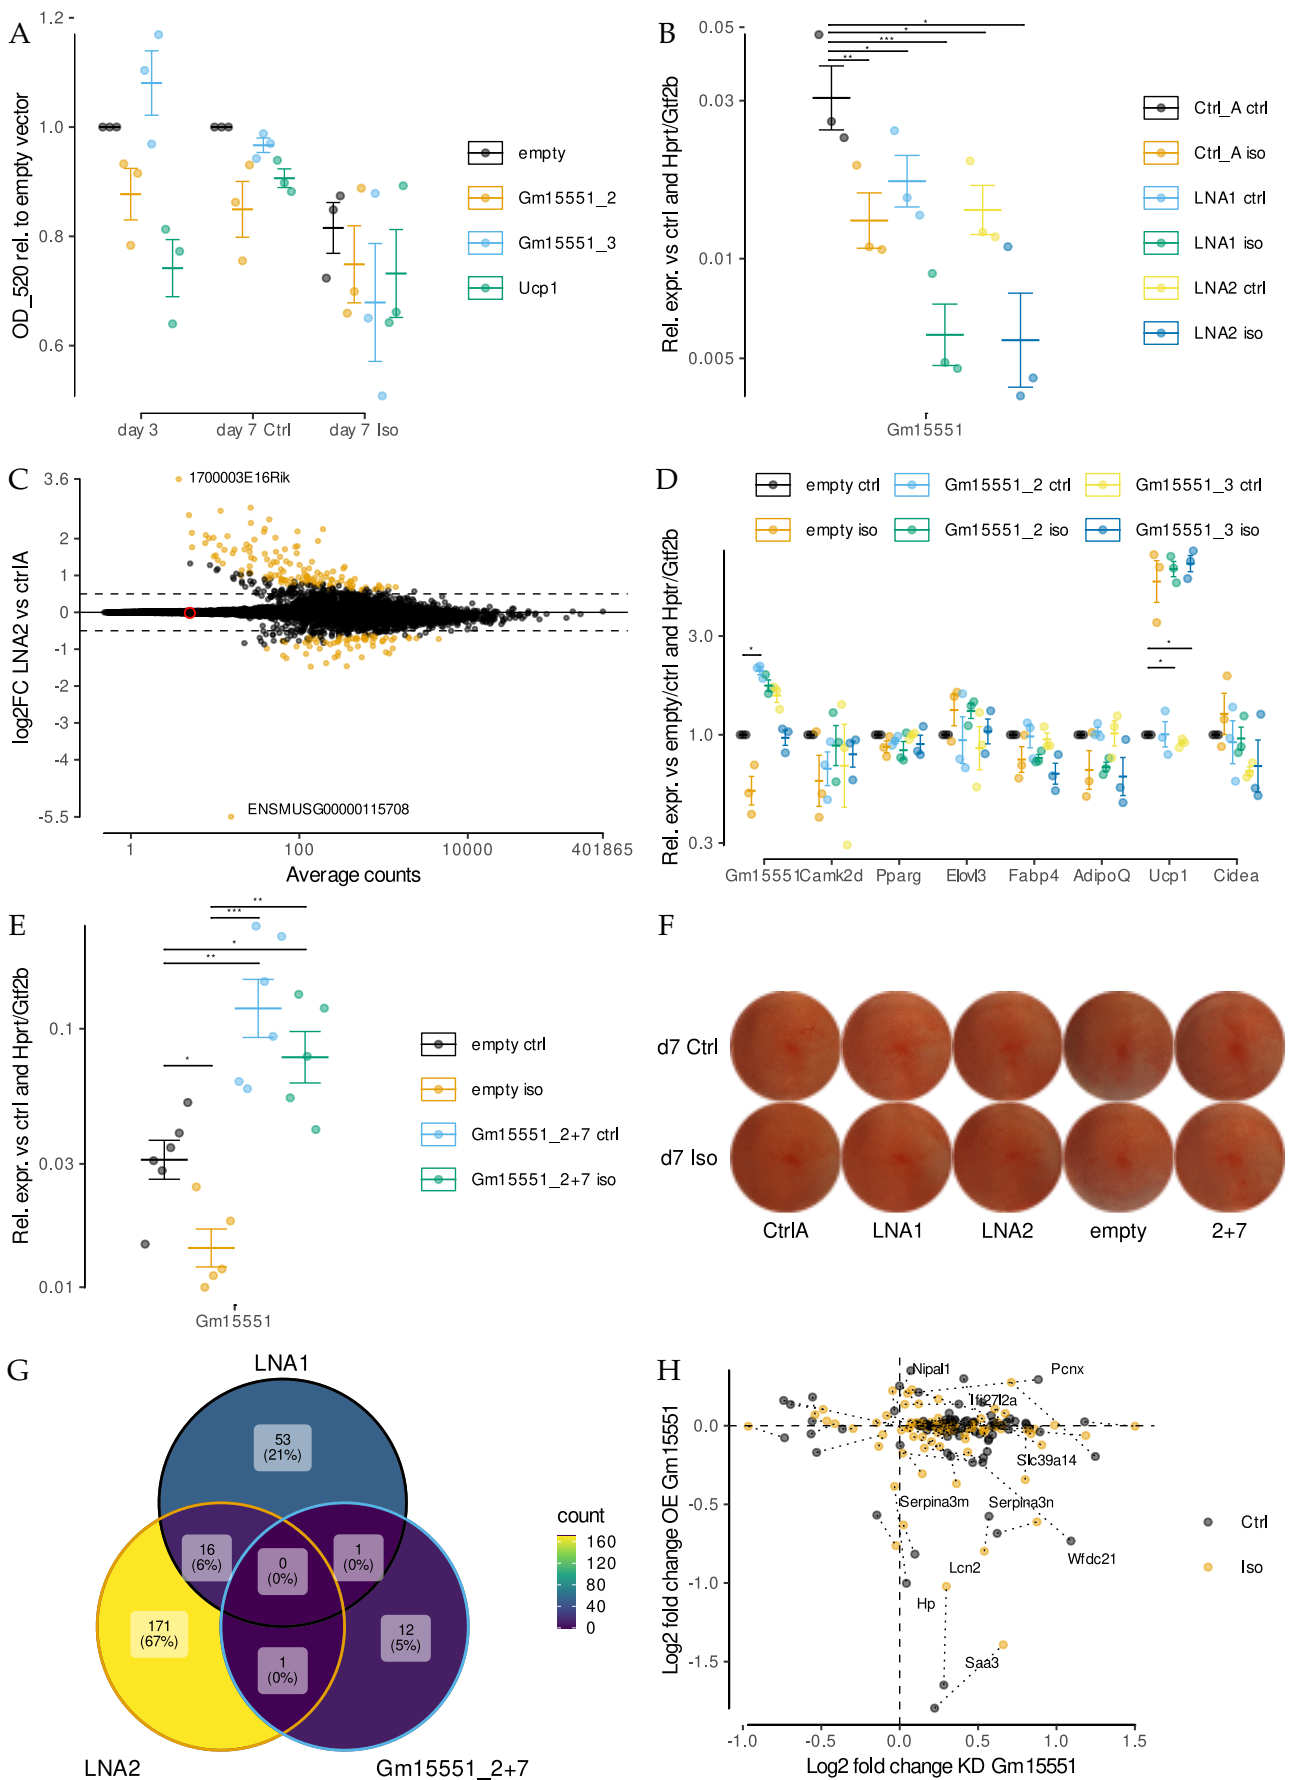

Figure S3: *Gm15551* is dispensable for iBAT function *in vitro*.

740

741

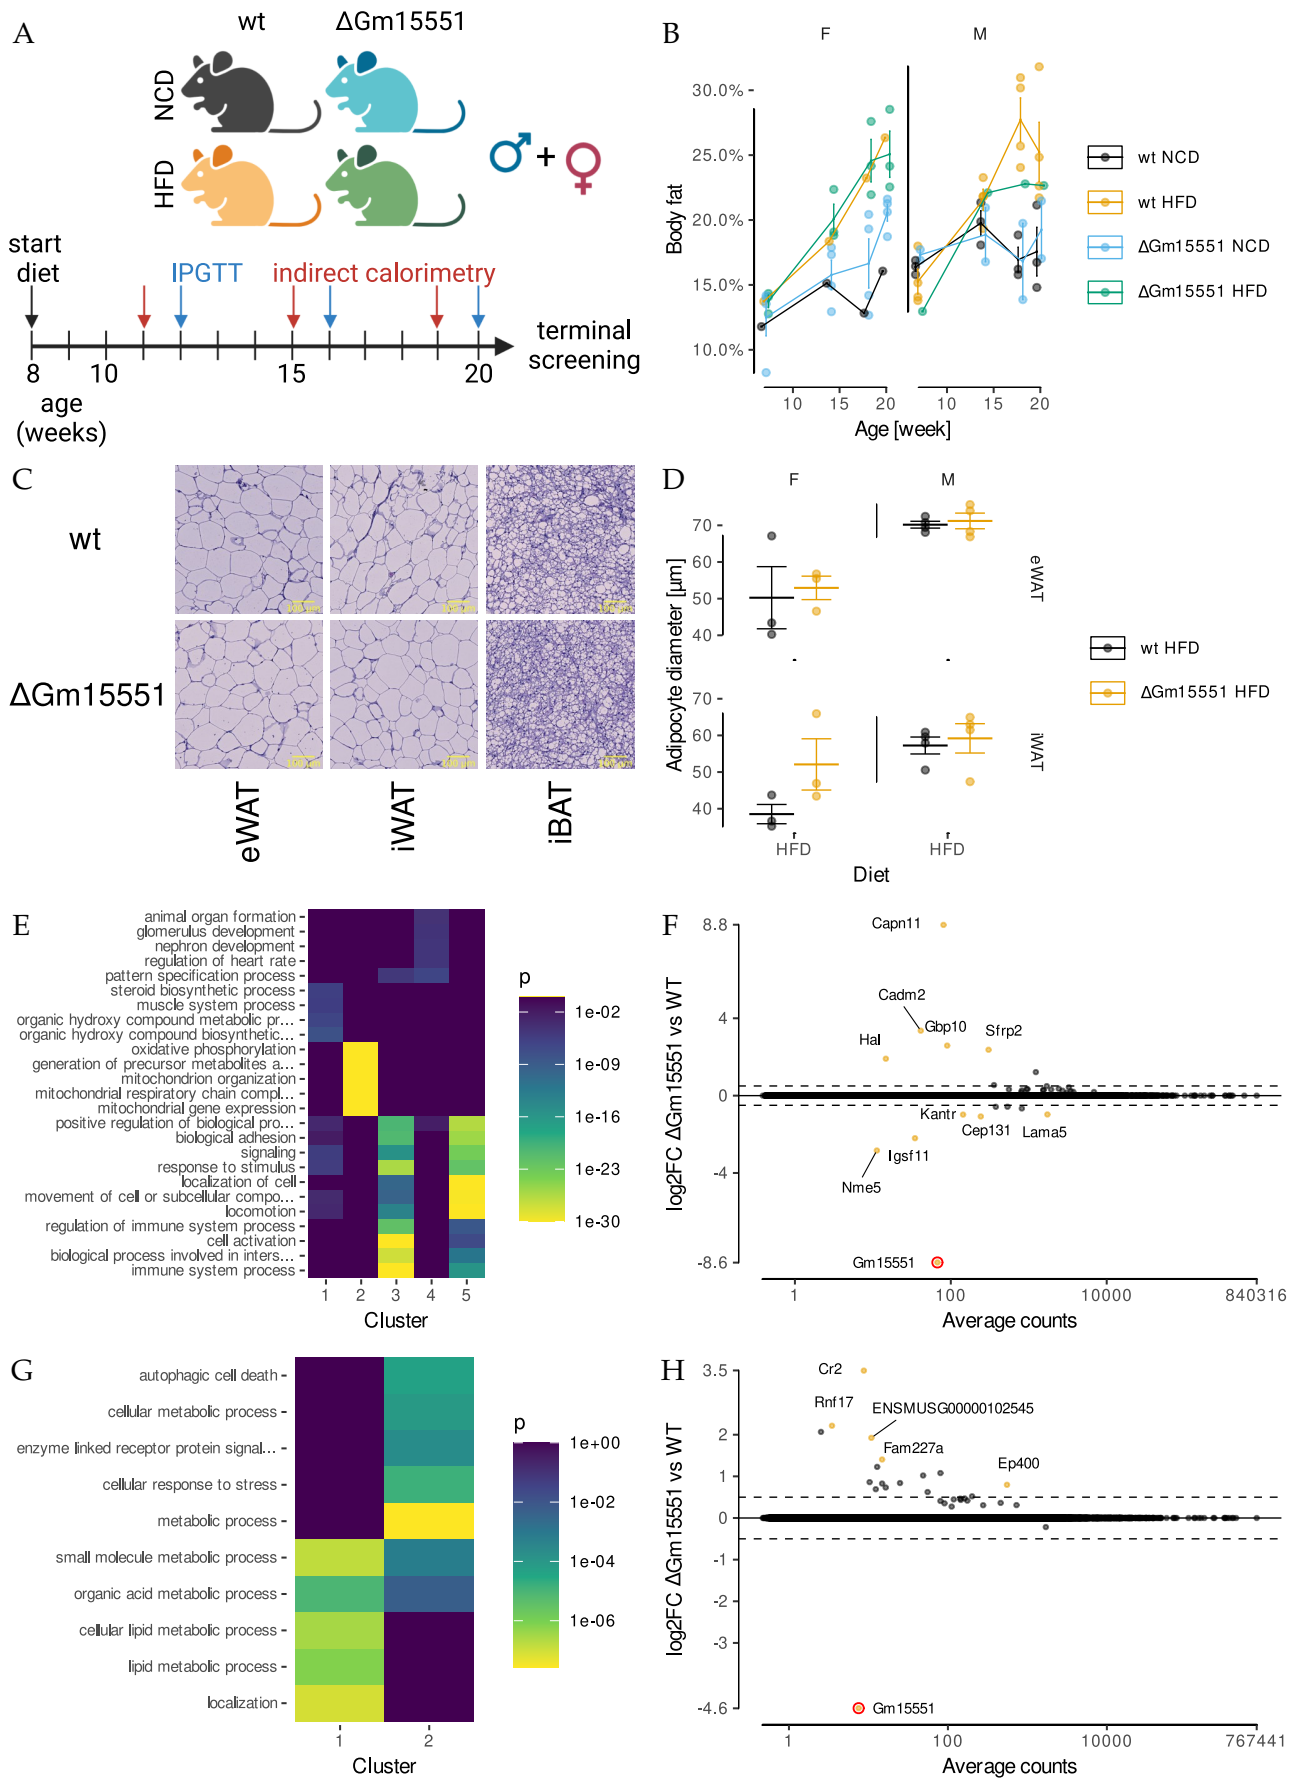

Figure S4: *Gm15551* is dispensable for iBAT function *in vivo*.

742

743

744 **14 Supplementary tables**

745 Table S1: Sequences of genotyping PCR primers.

| Name | Sequence               |
|------|------------------------|
| F3   | GCTGTCAGCCGTGGTCTATT   |
| R2   | TCACCATTTTCTCAGACTGCAC |
| F5   | CCCCCTGCCTCTCCATCTAT   |
| R4   | TTCGATGATGAGAGAAGGGAAC |

747 Table S2: Sequences of sgRNAs.

| Target    | Sequence             |
|-----------|----------------------|
| Gm15551-2 | CACTTCCAGTTATATAAGCG |
| Gm15551-3 | ACTTCCAGTTATATAAGCGT |
| Gm15551-7 | AGGGTTTTTTGCTAAAACGG |
| Ucp1      | GGGAGTGACGCGCGGCTGGG |

749 Table S3: Sequences of LNAs.

| Name               | Sequence         | Cat. no.              |
|--------------------|------------------|-----------------------|
| Negative control A | AACACGTCTATACGC  | 339515 LG00000002-DDA |
| Negative control B | GCTCCCTTCAATCCAA | 339515 LG00000001-DDA |
| Gm15551-2          | GATGACTGAGATTAGA | 339511 LG00228509-DDA |
| Gm15551-7          | AAGTAGCACGGCGTTG | 339511 LG00228510-DDA |

751 Table S4: Sequences of qPCR primers.

| Target  | forward                | reverse                |
|---------|------------------------|------------------------|
| Gtf2b   | GTGGGATCTGAATGGAGAACTT | CCTGTACCCTTGCCAATCAT   |
| Gm15551 | ACGGCGTTGGAAGGCTCT     | CACCCGTGCAACGCCTG      |
| Ucp1    | CCTTCCCCTGGACTG        | GGCCTTCACCTTGGATCTGA   |
| Pparg   | CACAATGCCATCAGGTTTGG   | CAGCTTCTCCTTCTCGGCCT   |
| AdipoQ  | GACACCAAAAGGGCTCAGG    | TTAGGACCAAGAAGACCTGC   |
| Fabp4   | AAATCACCGCAGACGACAGG   | CGCCATCTAGGGTTATGATGCT |
| Elovl3  | AGCAAGGTTGTTGAACTGGGA  | GACGCTTACGCAGGATGATGA  |
| Cidea   | AGGCCGTGTTAAGGAATCTGCT | GCCCAGTACTCGGAGCATGT   |
| Lep     | TGTGCTGCAGATAGCCAATGA  | AGATGGAGGAGGTCTCGGAGA  |

753 Table S5: Antibodies used for chromatin modification ChIP-Seq.

| Target           | Source             | Dilution   |
|------------------|--------------------|------------|
| Histone H3K27ac  | Active Motif 39133 | 5 $\mu$ l  |
| Histone H3K27me3 | Active Motif 39155 | 5 $\mu$ l  |
| Histone H3K4me1  | Active Motif 39297 | 10 $\mu$ l |
| Histone H3K4me3  | Active Motif 39159 | 3 $\mu$ l  |



## 755 15 Legends

### 756 **Fig 1: RNA-Seq reveals temperature and obesity dependent changes in iBAT lncRNA** 757 **expression**

758 **A** Experimental design. Total transcriptomes from the iBAT of 20 week old mice housed at 22 °C or  
759 4 °C for 24 h (n = 3) fed either a high fat or a control diet for 12 weeks were analysed together with  
760 the total-transcriptomes from seven metabolically active tissues (n = 1, GSE121345). The union of  
761 GENCODE and RNAcentral annotated genes was used for the analysis to reveal lncRNAs which  
762 are both adipose tissue specific and regulated by physiologically relevant stimuli. Created with  
763 BioRender.com. **B** Hierarchical clustering of genes differentially regulated by diet and cold treat-  
764 ment in adipose tissue (likelihood ratio test, FDR < 0.001). Colour code depicts row wise standard-  
765 ised expression. **C** GO enrichment analysis for the gene clusters shown in B. **D** Expression levels and  
766 changes for lncRNA genes in iBAT from cold treated compared to control mice on control diet. Genes  
767 showing significant differential gene expression are colour coded indicating their adipose tissue spe-  
768 cificity (wald test, log2 fold change (log2FC) > 0.5, n = 6, s < 0.05).

### 769 **Fig S1: RNA-Seq reveals temperature and obesity dependent changes in iBAT lncRNA** 770 **expression**

771 **A** Adipose tissues and liver weights of 20 week old mice after cold and/or HFD treatment (*t*-test,  
772 n = 7 - 9). **B** Expression of common and brown specific adipose marker genes and the macrophage  
773 marker *Emr1* in iBAT and iWAT of cold and/or HFD challenged mice (*t*-test, n = 3 - 6). **C** IPGTT of  
774 HFD and control diet fed animals at 12 weeks to 14 weeks of age (*t*-test, n = 15). **D** Energy expenditure  
775 of HFD or control animals kept at either 22 °C or 4 °C measured by indirect calorimetry (n = 5 - 8).  
776 **E** Reactome pathway enrichment analysis for the clusters in Fig1 A. **F** Expression levels and changes  
777 for coding genes in iBAT from cold treated compared to control mice. Genes showing significant  
778 differential gene expression are colour coded indicating their adipose tissue specificity (wald test, n  
779 = 6, s < 0.05,  $H_0$ : log2FC > 0.5). **G** Overlap of differential gene expression (wald test, s < 0.05) and  
780 adipose tissue specificity (adipose score > 0.5) for coding and lncRNA genes. **H** Expression levels of  
781 immune cell marker genes in the total transcriptomes from iBAT of cold and/or HFD treated mice.

### 782 **Fig 2: *Gm15551* is an adipose tissue specific, diet and temperature regulated lncRNA**

783 **A** Expression of *Gm15551* in iBAT from cold treated and/or HFD fed mice. **B** Expression profile of  
784 *Gm15551*, the common adipocyte marker genes *Pparg* and *Adipoq* as well as the iBAT specific lncRNA  
785 *Lncbate10* and the brown adipocyte marker genes *Ucp1* and *Cidea* in seven metabolically active tis-  
786 sues. **C** Genomic locus of *Gm15551* showing the RNA expression as well as binding sites of *Prdm16* in  
787 iBAT (PRJNA269620) and *Pparg* in eWAT, iWAT and iBAT (PRJNA177164). **D** Ranked coding prob-  
788 ability of all genes expressed in the dataset as calculated by CPAT. Indicated are *Gm15551*, the coding  
789 genes *Ucp1*, *Adcy3* and *Cidea* as well as the lncRNAs *Ctcflos*, *H19* and *LncBate10*. **E**, **F** Expression  
790 profiles of *Gm15551*, the common adipocyte marker gene *Pparg* and the brown adipocyte marker  
791 gene *Ucp1* during the differentiation of PIBA cells (E) and in fully differentiated primary adipocytes  
792 (F) stimulated for 24 h with the non-selective  $\beta$ -adrenergic agonist isoproterenol or the  $\beta_3$ -specific  
793 agonist CL316243 (paired *t*-test, n = 4-5).

794 **Fig S2: *Gm15551* is an adipose tissue specific, diet and temperature regulated lncRNA**

795 **A** Genomic locus of *Gm15551* showing the RNA expression as well as chromatin modifications in  
796 iBAT of control mice. **B** Expression of *Gm15551* vs. *Camk2d* in indicated public RNA-Seq data sets.  
797 (Orange is the dataset from this study.) **C** Ranked ribosome scores as calculated from TRAP-Seq of  
798 murine iBAT (PRJNA402074). **D** Expression of *Gm15551*, *Pparg* and *Ucp1* in fully differentiated PIBA  
799 cells, stimulated with isoproterenol or CL316243 for either 6 h or 24 h (paired *t*-test,  $n = 2-3$ ).

800 **Fig 3: *Gm15551* is dispensable for iBAT function *in vitro***

801 **A, B** Gene expression profiles (A) of *Gm15551*, the common adipocyte marker genes *Pparg*, *Adipoq*  
802 and *Fabp4* as well as the brown adipocyte marker gene *Ucp1* (paired *t*-test,  $n = 2 - 6$ ) and oil red o  
803 staining (F) of wt1-SAM cells transfected with plasmids coding for sgRNAs targeting *Gm15551*, *Ucp1*  
804 or empty vector two days before induction of differentiation. **C, D** Hierarchical clustering of genes  
805 differentially regulated by  $\beta$ -adrenergic stimulation and/or knockdown (C) or overexpression (D)  
806 in mature adipocytes at day 4 of differentiation (LRT,  $n = 3$  (C) or 4 (D),  $p < 0.001$ ). **E, F** Effect of  
807 knockdown (E) or overexpression (F) of *Gm15551* on gene expression in mature wt1-SAM cells. The  
808 log2FC is the average over the effect in isoproterenol stimulated and control cells (wald test, log2FC  
809  $> 0.5$ ,  $n = 6$  (E) or 8 (F),  $s < 0.05$ ).

810 **Fig S3: *Gm15551* is dispensable for iBAT function *in vitro***

811 **A** Quantification of lipid accumulation by oil red O staining of wt1-SAM cells transfected with plas-  
812 mids encoding sgRNAs targeting *Gm15551* or empty vector two days before induction of differenti-  
813 ation (paired *t*-test,  $n = 3 - 6$ ). **B** Efficiency of the knockdown of *Gm15551* using wo different LNAs  
814 in mature wt1-SAM cells (paired *t*-test,  $n = 3$ ). **C** Effect of knockdown of *Gm15551* using LNA2 at  
815 day 4 of differentiation on gene expression in mature wt1-SAM cells (wald test, log2FC  $> 0.5$ ,  $n =$   
816  $6$ ,  $s < 0.05$ ). **D** Gene expression of *Gm15551*, *Camk2d*, the general adipocyte markers *Pparg*, *Elovl3*,  
817 *Adipoq* and *Fabp4* as well as the brown adipocyte marker genes *Ucp1* and *Cidea* in mature wt1-SAM  
818 cells after overexpression of *Gm15551* at day 4 of differentiation (paired *t*-test,  $n = 3$ ). **E** Efficiency of  
819 overexpression of *Gm15551* in mature wt1-SAM cells using a combination of 2 sgRNAs (wald test,  
820 log2FC  $> 0.5$ ,  $n = 6$ ,  $s < 0.05$ ). **F** Oil red O staining of mature wt1-SAM cells after transfection with  
821 LNAs or plasmids encoding sgRNAs targeting *Gm15551* at day 4 of differentiation. **F** Effect of gain  
822 and loss of function of *Gm15551* in mature adipocytes on lipid accumulation. **G, H** Overlap between  
823 genes showing differential regulation and comparison of their gene expression changes in wt1-SAM  
824 cells upon knockdown or overexpression of *Gm15551* ( $s < 0.05$ ) at day 4 of differentiation.

825 **Fig 4: *Gm15551* is dispensable for iBAT function *in vivo***

826 **A** Body weight of  $\Delta Gm15551$  and wild type mice fed a high fat or control diet. **B** IPGTT of 12, 16 and  
827 20 week old  $\Delta Gm15551$  and wild type mice fed a high fat or control diet. **C, D** Energy expenditure  
828 (C) and respiratory exchange rates (D) of 12, 16 and 20 week old  $\Delta Gm15551$  and wild type mice  
829 fed a high fat or control diet. **E** Hierarchical clustering of genes differentially regulated between  
830 adipose tissues or by knockout of *Gm15551* in 12 week old mice (LRT,  $n = 3$ ,  $p < 0.001$ ). **F** Hierarchical  
831 clustering of genes differentially regulated by temperature or by knockout of *Gm15551* in in iBAT of  
832 12 week old mice (LRT,  $n = 3$  or 5,  $p < 0.001$ ).

833 **Fig S4: *Gm15551* is dispensable for iBAT function *in vivo***

834 **A** Experimental design. Male and female  $\Delta Gm15551$  and wild type litter mates were either put on  
835 HFD or control diet for 12 weeks starting at 8 weeks of age. IPGTT and indirect calorimetry measure-  
836 ments were repeatedly performed at the indicated timepoints. Created with BioRender.com. **B** Body  
837 fat percentage of  $\Delta Gm15551$  and wild type mice fed a high fat or control diet. **C, D** Representative  
838 microphotographs (C) and adipocyte diameters (D) in different adipose tissue from 20 week old wt  
839 and  $\Delta Gm15551$  mice fed a HFD. **E** GO enrichment analysis for the gene clusters shown in Fig 4E.  
840 **F** Gene expression changes induced by the knockout of *Gm15551* in different adipose tissues (wald  
841 test,  $n = 3$ ,  $s < 0.05$ ,  $H_0: \log_2FC > 0.5$ ). **G** GO enrichment analysis for the gene clusters shown in  
842 Fig 4F. **H** Gene expression changes induced by the knockout of *Gm15551* in iBAT of cold treated and  
843 room temperature housed mice (wald test,  $n = 3$  or  $5$ ,  $s < 0.05$ ,  $H_0: \log_2FC > 0.5$ ).
